# Supplementary material
Source: PubMed Central journal article supplement (PMC5851899)
Supplement: NIHMS945745-supplement-Supplement.pdf [file NIHMS945745-supplement-Supplement.pdf]

**Supplementary information S1 (box). Supplementary Methods description.****Prokaryotic Genome Database**

Archaeal and bacterial genome sequences were downloaded from the NCBI FTP site (<ftp://ftp.ncbi.nlm.nih.gov/genomes/all/>) in March 2016. For incompletely annotated genomes (coding density less than 0.6 CDS per kbp) the existing annotation was discarded and replaced with Meta-GeneMark <sup>1</sup> annotation. Altogether the database includes 4,961 completely sequenced and assembled genomes and 43,599 partially sequenced genomes coding for  $1.85 \times 10^8$  proteins.

**Clustering and Phylogenetic Analysis**

To construct a non-redundant, representative sequence set, sequences were clustered using the NCBI BLASTCLUST program <sup>2</sup>. (<ftp://ftp.ncbi.nih.gov/blast/documents/blastclust.html>) with the sequence identity threshold of 90% and length coverage threshold of 0.9. The longest sequence was selected to represent each cluster. Permissive clustering of sequences was performed using UCLUST <sup>3</sup>, with sequence similarity threshold of 0.3.

Multiple alignments of protein sequences were constructed using MUSCLE <sup>4</sup> and MAFFT <sup>5</sup> programs. Sites with the gap character fraction values  $>0.5$  and homogeneity  $<0.1$  <sup>6</sup> were removed from the alignment. Phylogenetic analysis was performed using the FastTree program <sup>7</sup>, with the WAG evolutionary model and the discrete gamma model with 20 rate categories.

Relationships within diverse sequence families were established using the following procedure: initial sequence clusters were obtained using UCLUST <sup>3</sup> with the sequence similarity threshold of 0.5; sequences were aligned within clusters using MUSCLE <sup>4</sup>. Then cluster-to-cluster similarity scores were obtained using HHSEARCH <sup>8</sup> (including trivial clusters consisting of a single sequence each); a UPGMA dendrogram was constructed from the pairwise similarity scores. Highly similar clusters (pairwise score to self-score ratio  $>0.1$ ) were aligned to each other using HHALIGN <sup>8</sup>; the procedure was repeated iteratively. At the last step, sequence-based trees were reconstructed from the cluster alignments using the FastTree program <sup>7</sup> as described above and rooted by mid-point; these trees were grafted to the tips of the profile similarity-based UPGMA dendrogram.

### Pipeline for CRISPR-Cas loci annotation

The pipeline takes a list of locations (coordinates in the corresponding nucleotide sequence) of the seed features as input. Two types of seeds were used: locations of *casI* genes in the NCBI WGS database and locations of CRISPR arrays in the WGS database and the prokaryotic genome database. TBLASTN searches<sup>9</sup> with the E-value cutoff of 0.01 and low complexity filtering turned off were run with the Cas1 profiles<sup>10</sup> as queries, resulting in the identification of 20,766 loci. The CRISPRfinder<sup>11</sup> and PILER-CR<sup>12</sup> programs were used with default parameters to identify CRISPR arrays in the WGS database (47,174 loci found) and in the prokaryotic genome database (45,373 loci found). Sequences including up to 10 kbp upstream and downstream of the seed features were extracted.

Open Reading Frame (ORF) annotation was performed using Meta-GeneMark<sup>1</sup> with the standard model MetaGeneMark\_v1.mod (Heuristic model for genetic code 11 and GC 30). All ORFs were further annotated using RPS-BLAST<sup>13</sup> searches with 30,953 profiles (COG, pfam, cd) from the NCBI CDD database<sup>14</sup> and 217 custom Cas protein profiles<sup>10</sup>. The CRISPR-Cas system (sub)type identification for all loci was performed using the previously described procedures<sup>10 15</sup>.

Among all permissive clusters constructed from proteins from the seed loci, potential candidates were selected using the size threshold (> 500aa), the distance to seed (genes closest to the seed were preferred); the selection of candidates was limited to those that were located within 4 genes from the seed; clusters that contained more homologs outside the seed loci than in those loci were discarded. Additional prediction of protein domains was performed using the CD-search<sup>16</sup> and HHpred<sup>8</sup>.

The identified candidates were used as queries for a PSI-BLAST search against the NCBI NR and NCBI WGS databases for the Cas1 seeds, and NCBI WGS and prokaryotic databases for the CRISPR seeds in order to obtain additional loci that were added to the seed list. The evaluation procedure was then repeated until convergence.

### Protospacer analysis

The initial pool of 488,437 spacers in the CRISPR arrays was reduced to 268,409 unique sequences. The MEGABLAST program <sup>17</sup>(word size 18) was used to search for protospacers in the virus subset of NR database (TaxID:10239) and the prokaryotic genome database. The maximum number of mismatches for a spacer with length  $l$  was limited to  $\max(0, \sqrt{l - 22})$ . All MEGABLAST hits that target CRISPR arrays as well as all eukaryotic virus sequences were discarded. This procedure produced 63,939 hits to prokaryotic genomes and 5,095 hits to prokaryotic viruses. The 33480 ORFs that contained or intersected with the detected protospacers were used as BLASTP queries to search the virus database. All ORFs with strong hits (e-value  $<10^{-6}$ ) were classified as originating from (pro)viruses.

### Synteny analysis of subtype V-U loci

Protein sequences encoded by genes in the vicinity ( $\pm 3$  genes) of the Type V-U effector genes were extracted and clustered using UCLUST <sup>3</sup>with the similarity threshold of 0.3. Genes were annotated by the cluster IDs; each locus was represented as a set of genes and unordered gene pairs. Weighted Jaccard similarity coefficient was calculated for all pairs of loci as previously described <sup>15</sup>, a locus similarity graph was constructed with the similarity threshold of 0.61 ( $e^{-0.5}$ ), and connected components (subsets of highly similar loci) were extracted.

### Analysis of selection in the evolution of Class 2 effector genes

Nucleotide and protein sequences of the effector genes were collected; clusters of identical protein sequences were reduced to a single representative; remaining sequences were clustered using UCLUST <sup>3</sup>with the similarity threshold of 0.67. The sequences from each cluster were aligned, and a phylogenetic tree was constructed as described above and rooted using a modified midpoint procedure. Sub-alignments of protein sequences, corresponding to sub-trees with the mean depth  $<0.1$ , were extracted and converted to the nucleotide sequence alignments. Pairwise  $dN$ ,  $dS$  and  $dN/dS$  values were obtained using the codeml program of the PAML package <sup>18</sup>. Sequence pairs with  $0.0002 \leq dN \leq 1.0$  and  $0.0002 \leq dS \leq 1.0$  were selected, and the  $dN/dS$  values were calculated.

## References

- 1 Zhu, W., Lomsadze, A. & Borodovsky, M. Ab initio gene identification in metagenomic sequences. *Nucleic Acids Res* **38**, e132 (2010).
- 2 Wheeler, D. & Bhagwat, M. BLAST QuickStart: example-driven web-based BLAST tutorial. *Methods Mol Biol* **395**, 149-176 (2007).
- 3 Edgar, R. C. Search and clustering orders of magnitude faster than BLAST. *Bioinformatics* **26**, 2460-2461 (2010).
- 4 Edgar, R. C. MUSCLE: multiple sequence alignment with high accuracy and high throughput. *Nucleic Acids Res* **32**, 1792-1797 (2004).
- 5 Katoh, K. & Standley, D. M. MAFFT multiple sequence alignment software version 7: improvements in performance and usability. *Mol Biol Evol* **30**, 772-780 (2013).
- 6 Yutin, N., Makarova, K. S., Mekhedov, S. L., Wolf, Y. I. & Koonin, E. V. The deep archaeal roots of eukaryotes. *Mol Biol Evol* **25**, 1619-1630 (2008).
- 7 Price, M. N., Dehal, P. S. & Arkin, A. P. FastTree 2--approximately maximum-likelihood trees for large alignments. *PLoS One* **5**, e9490 (2010).
- 8 Soding, J. Protein homology detection by HMM-HMM comparison. *Bioinformatics* **21**, 951-960 (2005).
- 9 Altschul, S. F. *et al.* Gapped BLAST and PSI-BLAST: a new generation of protein database search programs. *Nucleic Acids Res* **25**, 3389-3402 (1997).
- 10 Makarova, K. S. & Koonin, E. V. Annotation and Classification of CRISPR-Cas Systems. *Methods Mol Biol* **1311**, 47-75 (2015).
- 11 Grissa, I., Vergnaud, G. & Pourcel, C. CRISPRfinder: a web tool to identify clustered regularly interspaced short palindromic repeats. *Nucleic Acids Res* **35**, W52-57 (2007).
- 12 Edgar, R. C. PILER-CR: fast and accurate identification of CRISPR repeats. *BMC Bioinformatics* **8**, 18 (2007).
- 13 Marchler-Bauer, A. *et al.* CDD: a database of conserved domain alignments with links to domain three-dimensional structure. *Nucleic Acids Res* **30**, 281-283 (2002).
- 14 Marchler-Bauer, A. *et al.* CDD: conserved domains and protein three-dimensional structure. *Nucleic Acids Res* **41**, D348-352 (2013).
- 15 Makarova, K. S. *et al.* An updated evolutionary classification of CRISPR-Cas systems. *Nat Rev Microbiol* **13**, 722-736 (2015).

- 16 Marchler-Bauer, A. & Bryant, S. H. CD-Search: protein domain annotations on the fly. *Nucleic Acids Res* **32**, W327-331 (2004).
- 17 Zhang, Z., Schwartz, S., Wagner, L. & Miller, W. A greedy algorithm for aligning DNA sequences. *J Comput Biol* **7**, 203-214 (2000).
- 18 Yang, Z. PAML 4: phylogenetic analysis by maximum likelihood. *Mol Biol Evol* **24**, 1586-1591 (2007).

**Supplementary information S2 (box). Supplementary Excel Files**

located at the following FTP site:

<ftp://ftp.ncbi.nlm.nih.gov/pub/wolf/suppl/CRISPRclass2NRM/>

**Supplementary information S2 (box, part a) (MS Excel): Pipeline output for all protein families associated with CRISPR arrays.** Protein clusters  $\pm 10$  kb vicinity of CRISPR arrays, their annotation (if any) and representative sequences. All clusters are sorted by the relative frequency of genes in the CRISPR loci.

**Supplementary information S2 (box, part b) (MS Excel): Pipeline output for all protein families associated with CRISPR arrays.** Protein clusters  $\pm 10$  kb vicinity of CRISPR arrays, their annotation (if any) and representative sequences. All clusters are sorted by the relative frequency of genes in the CRISPR loci.

**Supplementary information S2 (box, part c): Class 2 loci.** For each Class 2 effector gene the surrounding genomic locus is given. Protein-coding genes and CRISPR arrays are shown. Genes annotated in GenBank are identified with GenBank locus tags; genes annotated de novo are identified by contig IDs and gene numbers.

**Supplementary information S2 (box, part d): TnpB family FastTree in the newick format.** Complete tree used for the Figure 3A is provided. Sequences are denoted by a local GI number, species name and those that are located next to CRISPR array marked by “CRISPR” prefix. More details on the sequences could be found in supplementary information S2 (box, part g).

**Supplementary information S2 (box, part e) (MS Excel): CRISPR array spacers.** Unique spacers were retrieved from all CRISPR arrays in supplementary information S2 (box, part a). Similarity searches were performed using MEGABLAST (see supplementary information S1 (box)). Hits are annotated as follows: Spacer ID (column 1) includes contig ID where this spacer was found, CRISPR coordinates and position number of the spacer in CRISPR array separated by underscore. For the hits (column 2,3,4) coordinates of best spacer hit (contig ID, hit start position, hit end position) are shown. Brief information about hit identity and annotation is provided (column 5) as follows: “Intergenic” stands for hits that do not target ORFs or viruses. “ORF” for hits into ORF that do not have good hits in virus contigs, “Virus” for hits that targets viruses.

**Supplementary information S2 (box, part f) (MS Excel): CRISPR-Cas systems and CRISPR arrays in the genomes with Type V-U system.** For each complete genome that contains at least one V-U representative all CRISPR-Cas loci, CRISPR arrays and sequences or repeats are provided. Loci are annotated according to the CRISPR-Cas system classification. V-U genes are indicated.

**Supplementary information S2 (box, part g) (MS Excel): HEPN domain proteins in the CRISPR vicinity.** All protein containing HEPN domains from the known families located in the vicinity of CRISPR arrays are listed. The following information is provided: gene ID and location, HEPN family, CRISPR-Cas system type (if any), sequence cluster ID.

**Supplementary information S2 (box, part h) (MS Excel): Sequences used for analysis of type V systems and TnpB family.** For each sequence that was used for reconstruction of the phylogenetic tree (Figure 2 and supplementary information S1 (box)) and profile dendrogram (supplementary information S3) the following information is provided: TnpB sequence ID and its coordinated in the genome, cluster ID, subfamily description, Genome ID and species name and association with CRISPR array (if any).

**Supplementary information S3 (figure). Multiple alignment of representatives from five V-U families.**

V-U1 and V-U4 families are aligned with regular TnpB, whose sequence IDs are shown in bold font. RuvC catalytic residues are highlighted by red letters. For V-U5 with inactivated RuvC domain HHpred output demonstrating similarity with TnpB is shown. Additional information for respective sequences could be found using numeric IDs in supplementary information S2 (box, part h). Alignments are colored using [http://www.bioinformatics.org/sms/multi\\_align.html](http://www.bioinformatics.org/sms/multi_align.html) server according to 80% consensus for the following groups of amino acids: ILMV,FWY,KRH,DE,GAS,C.

V-U1 family

|                  |                                                                   |       |
|------------------|-------------------------------------------------------------------|-------|
| 1903609002       | -----MT                                                           | 2     |
| 1024922355       | -----MT                                                           | 2     |
| 1096423661       | -----M                                                            | 1     |
| 118577413        | MKRVTTITIDGEQTKGIVIGTIAANHTAAEWLLTASVSAKSAKVRFPDPEEAVAETS---      | SL 57 |
| 1003450287       | -----MPFGKKARHVKA Y---                                            | QF 15 |
| 1507071745       | -----METAATKNYLALS F                                              | 14    |
| <b>488601079</b> | -----                                                             | 0     |
| <b>297565028</b> | -----                                                             | 0     |
| <b>257060308</b> | -----                                                             | 0     |
|                  |                                                                   |       |
| 1903609002       | TMTVHTMGVHY-----KW----QIPEVLRQQLWLAHNLR                           | 33    |
| 1024922355       | RVTVQTAGVHY-----KW----QMPDQLTQQLRLAHDLR                           | 33    |
| 1096423661       | AITVHTAGVHY-----RW--TDNPPEQLMRQLRLAHDLR                           | 34    |
| 118577413        | VMIAPTRTEKYLVLVPDEQVQPVTIIVRKYGLLSPLDWDCPDYPAGDAFEHLFLQNKLWN      | 117   |
| 1003450287       | GADAPQEGMEAV-----LEQHRLRTDY YN                                    | 39    |
| 1507071745       | GCLSPTRGEEYL-----LDQIKKKHDLWN                                     | 38    |
| <b>488601079</b> | -----                                                             | 0     |
| <b>297565028</b> | -----                                                             | 0     |
| <b>257060308</b> | -----                                                             | 0     |
|                  |                                                                   |       |
| 1903609002       | DLVSLQLAYDDLKAIWS SYPDVAQAEDTMAAAEADAVALSERVKQARIEARSKKISTE-      | 92    |
| 1024922355       | DLVTLEYEYEDAVKAVWS SYPAAVALEAQAELDERASELASTVKEEKSRQRTKRPSHP-      | 92    |
| 1096423661       | DLVTLQLDYE TAKAGIWS SYPAAAAETELADAESAEEQAAA AVSEERTKLRTKRITGP-    | 93    |
| 118577413        | DLVTIEREHRKYRELIG DEETAQMDTEIASIKDRLSVLDEGRKKLRVEHRKKKCP EID      | 177   |
| 1003450287       | ALVEMELRQREE-RTALL ANLAAES-----GLESPNQVYERLKAA--GEKGRKHPEYV       | 90    |
| 1507071745       | KLVEKDREHREKVRQVMV ESETTK-----KIKELEEELNSLREE IKNQRKTKRTGKVD      | 92    |
| <b>488601079</b> | -----MLI SYRFRIYPS-----                                           | 12    |
| <b>297565028</b> | -----MSLL VKCKLIPDA-----ST-----                                   | 16    |
| <b>257060308</b> | -----MLE QPITVACKL-----QV-----                                    | 15    |
|                  |                                                                   |       |
| 1903609002       | ---L TQQLRDAKKRLKDARQARRDAI AVVKDDAAERRKARSDQLAADQKALYGYCRDGD     | 149   |
| 1024922355       | ---AVAQLAE TRAQ LKAAKASREAI ASVRDEATERLRTISDERYAAQQLYRDYCTDGL     | 149   |
| 1096423661       | --LAQKLTAAARKRVREARSTRRAAI SEVHEEAKGRLVDASDALKAQKALYKTYCQDGD      | 150   |
| 118577413        | CLDENIKKL--KSELKAVASKAKETRAAAKDRIRAAGNDIENLEKDRQA AVIKAYN-NSG     | 234   |
| 1003450287       | AAREQKALYGHPRLELQSRQREERN-----ALRRSFG-AKG                         | 127   |
| 1507071745       | LT DQKARIEE IKPQLKQLKEKFKEERSFI---FEARKQELAQLEKER-WAVVKELGKGS G   | 148   |
| <b>488601079</b> | -----KTVQAKLNEQLELC--                                             | 26    |
| <b>297565028</b> | -----AEKLSRT NQFANAC--                                            | 31    |
| <b>257060308</b> | ---ANTLAKEIDET MVFACAC--                                          | 34    |
|                  |                                                                   |       |
| 1903609002       | LYWASFN TVLDHHK TAVKRIAAQRAS GKPATLRHHRFD-GSGTIAVQLQRQAGAPPRT PM  | 208   |
| 1024922355       | LYWATFN AVL DHHK TAVKRIAAHRKQG RAAQLRHHRWD-GTGTISVQLQRQATDPART PA | 208   |
| 1096423661       | LF--ATFN DVL DHHK AAVKRIGQMRAAGQPAQLRHHRFD-GTGSIAVQLQRQAGQPQRT PE | 209   |
| 118577413        | LWNGNY NAVLESYKKA--RIKA---LKDGAELKYHRFD-GSGRFTNQIQG--GMSVQD--     | 284   |
| 1003450287       | LYSSNY LDVERAFDKA--RQSP-----ELRFRRYSPHEGRLAVLYTE--GLPMRE--        | 173   |
| 1507071745       | LYWCNLEDV VNSYDIG--RKKA---KAAGGEMRFHRWD-GTGKVTVRVFK--GLPVNE--     | 198   |
| <b>488601079</b> | -RW-LYNRLLSEVNKA-----RKEGRRI RRED--TQSLIVRIKR----EEKPE            | 66    |
| <b>297565028</b> | -N-----ALQVARR-----DNIWN F---A--LQRAVYADLR----AEY--               | 61    |
| <b>257060308</b> | -D-----VNQNT P-----EKMTN T---A--MQSLVYQDVR-----VNF--              | 63    |
|                  |                                                                   |       |
| 1903609002       | VLADEA-GKYRNVLH-----I-----PGWTD PDVWEQMT SQCRQSGRV                | 246   |

1096423661 LIADVD-GKYGRVLS-----V-----P-WVQPDRWERIP RERRMIGRV 246  
 118577413 LL-----EGNRNVAS-----LRLVSSGELGDISGKKP--PSLDLQSVGS RDRSREYGIL 331  
 1003450287 IG-----SDTRVQL-----P--LPDPIIYRD- RTRRKHQRV 202  
 1507071745 MF-----SCTNNLLQ-----I-----DP--VDKDAWYNPV RIRRKSRT 231  
**488601079** LS-----KVYSKVLQMVNYQLRSNSSLNELRKKGVKVGWLRKYKTS PNSTF RNLNFNQSGF 121  
**297565028** -----GLSANLAIRAI-----ARVGRKRGHKAGGFKATSVDYDQ RLSVNVDT 105  
**257060308** -----GLSSNLAIQAIRRVCANRKTAKQKGGKVKKEFKPTSI SYDA RFSFRES DW 113

1903609002 T V RMRCGST-----DGQPQW---IDL P QVH R L P A D A D I T G A E V V T V V G I Y R A K C 298  
 1024922355 V I R M R C G S S R N P D G T K T S E W --- I D V P Q Q H R L P A D A D I T A A Q T V R E P A D L R A T G 303  
 1096423661 T V R M R A G Q L -----S G E P Q W --- L D I P Q Q H R L P L D A D I T G A R T V T T G T L R A Q S 298  
 118577413 A I T L Y T G T D -----E Q S K K F R R T L S F P I L H R L P E G A T L K S L S H R K V T D F V W S V F 386  
 1003450287 L M K F R V R S V -----E R Q P L W --- I T V P Y L H R L P D G - V C R E V S H W H V D R L R W T S 253  
 1507071745 R V R L R A C S E -----N K K P L F --- I E L P V L H R L P E D A L I R T A S I R E V M R Y R K N 283  
**488601079** K I -----D --- F D R K - K L S L S K V G D I P R L H R S I --- G G K I K G V I R R T S --- K W Y A I 167  
**297565028** T V -----S L S T V D G R V K V P M R I A G - Y Q R H L L R T A --- K S I Q G G Q - V R G D --- S W Y H 153  
**257060308** T V -----S V K L L N S R Q R I K L - L I G N Y Q I G L L S K --- N P T S A T --- V K R S --- N Y Y H 160

1903609002 T A R I G D T E P V T --- S G P - T V A L H L G W R S - T E E G T A V T W R S D A P L D I P F G L R T V M R V D A 352  
 1024922355 T A K I P D Q G E V D --- E G P - T I A V H L G W R S - S D H G T V V T W R S T E P L D I P E T L R G V I T T Q S 357  
 1096423661 T A K I P D P E P V T --- D G P - D V A V H L G W R N - T D T G V R V R W R S T E P I E V P F D F R D T L T V D P 352  
 118577413 T F T T D C P - T Y D Q R S T G N - R C G L N L G W K K Q A G G G L R V T - I -----Y D 426  
 1003450287 V V E V E G P - P V A --- S P T G R G A V A V D L G W R R - V E G G L R A F W V -----G E 292  
 1507071745 V L E I L G E - N T N R I L P A L E G T A A I D L G W R T - V K D G L R V C L V -----D D 324  
**488601079** Q A E V D K Q - P L P --- P T G R - A I G I D G I T H -----F C V -----D S 196  
**297565028** W C E Y D D P - P V L --- D P Q G - M L G V D L G I V N -----I T -----D S 182  
**257060308** T L D E P T Q - P E A --- K T D K - V L G V D L G R T D -----I T -----T S 189

1903609002 A B T S - G I I V V P A T T E R R L T R T E - N I A S S R S L A L D A L R D K V G W S D N D A --- P T Y R D A P L 407  
 1024922355 A E R T V G S I V V P H R I E Q R V H P H A - T V A S H R D L A V D S I R D T V A W T E H G P Q P H P - Y D G D P I 415  
 1096423661 G E R S - G E I F V P E A V P R R V E R A H - L I A S H R A D R M N E L R A R V D Y A E T G P R P H P S R E G E E L 410  
 118577413 G S D A - R H I T L P Q A I D G L D Y V N G D L Q G R I D S A A N E N H A W L E Q W G G --- D E L P --- E S L Q E 480  
 1003450287 D B A G - G E I A L S E G D L K Q F S K V E - D L R S I R D Q H L N A L K E A A A W P E A - P P A P L P --- D W L A E 347  
 1507071745 K E H S - E E L I L D N D V L H E F N K I K - D L Q S I R D N L F N E T K A K M E L K T --- L E L P --- D E A K E 377  
**488601079** D B N Y F E H --- P K Y L D R T L E K -----I K K Q K Q S R K Q -----K --- 226  
**297565028** D G E T Y S G --- K H L N S V R H R -----H R R L R K K L O K K G -----210  
**257060308** E B E S W S G --- K Q I T A K R N I -----Y A K R T T Q K K A -----S K G 220

1903609002 E A A T V K Q W K --- S P Q R F A S L A H A W K D N --- G T E I S D I L W A W F S L D R Q W A Q Q E N G R R K A L 461  
 1024922355 T A A S V Q R W K - A P R R F A W L A L Q W R D T P P P E G A D I A E T L E A W R R A D K Q L W L E S E H G R G R A L 473  
 1096423661 G A G N V R M W K - S P N R F A W L A R V W A D D E S V - S T D I R E A L A Q W R H Q D W I S W H H Q E G G R R R S A 467  
 118577413 L R S M L R R S K R P H P A K F A K A V I A W R N Y P E Y L G D A R D E A - E Q R R K A T K R L T I E M A H K R E K L L 539  
 1003450287 E T K T L P Q W R - S P A R F A A L F R R W Q S E R V H A D E A A Y G L L E G W H K R D R L W Q Y E A N L R E Q M I 405  
 1507071745 R T S H M A N W R - S Q Q K M L R L H Q Y W R E N R L P G D D E V W E V L E Y W R K R E I L Y E W Q E N L R D Q V L 435  
**488601079** G S K N -----R E K V R I G L A K L Y E K L E 246  
**297565028** T K G A -----K R --- L K K L S G K E T 226  
**257060308** T R S S -----R R R C R Q L L A R L S G K E R 240

1903609002 G H R D D L Y R Q I A A V I S D Q A --- G H L V G D T S - A E L S A R A --- M E R T - E L P T E V Q Q K I D R R 513  
 1024922355 R H R T D L H R Q V A A Y F A G V A --- G R V V D D S D - A Q I A G T A --- K H S - E L L T D V D R Q I A R R 524  
 1096423661 A Q R L D V Y R Q V A A V L V S Q A --- G R V L D D T S - Y A D I A Q R S A T T K T E - E L P N E T A A R I N R R 521  
 118577413 R R R M D F Y R N T A K Q L T S V Y --- D V C L D K M D - I R --- R L A L L E K G D G T P N E L T K I A R K Q 590  
 1003450287 L R R R E Q Y R V L A A T L A R Q Y --- D A I V E D F N - I R --- A A A E L D Q G - G --- S D L P D A A R R Y 453  
 1507071745 R R R K E I Y R I F A A K I T R K Y --- K T V L R E F T - I N K --- T V Q K P N P E E G P A G T L P --- A N R N 485  
**488601079** N Q R N D F L H K L B R Y Y V N N Y --- D I V V E D L N - K E --- M A --- E N - G S S T T --- L N R H 289  
**297565028** R F S N H V N H T L S K R I V A K A Q R T E R A I A L E D L Q G R E --- R V --- R L --- R R P Q --- R 270  
**257060308** R F Q K H I N H E I S R Q L V N N A V T N K Q A I A I E D L T G R E --- R T --- N --- R K P R S --- K K D K 287

1903609002 R D H A A P --- G G L R A S V V A A M T R D G V P V T I A A A D F T R T H S R H V N --- P A D D R Y L S N P V R 568  
 1024922355 R A I A A P --- G M L R A A V V A A A T R D E V P T T T S H T G L S R V H A A S H E N --- P A D D R Y L M Q P V L 579  
 1096423661 R A H A A P --- G E L R Q T L V A A A D R D A V P V D T S H T G V S V V H A K S H E N --- P S D G R F M S V V A 576  
 118577413 R Q Q A A I --- S E L R E C L S K A A A K N G T Q I E Q S T A - S S A T C S A S G K M --- E Q V D G I --- M W R 641  
 1003450287 R T I A S P --- S T L R D A L V N A F A Q R G K P V R K I N P A H T T D C H A S G A L V G D P A K E L --- R L Y 507



1507071745 RFIAAI--SEFRNELANACRKNHVEFTYVPAENTTITCHKCGHKEKFDAAAQI----IHT 539  
**488601079** ITDSAWSKFEV--RLICEKAERAARTVVKVNPKNKTSKRCAMCGYIVNNLKLHNR----TFT 343  
**297565028** ATLHSAWAFDLDGKLRKYKAERAGVPLVFVDPNRTSRQCPACGHAERANRPTQA----LFR 326  
**257060308** RLGNNAWAFYQLRQFLTYKCI LAGVKLILVNPAYTSLSCHKCLVIGDR---KGK----GFS 340

1903609002 CDGCGAMYDQDRSFVTLMLRAATAPSNP----- 596  
 1024922355 CDGCGRTYDTDLSATILMLQRAAATSN----- 607  
 1096423661 CDGCGEKYDQDESALTHMLTRAVQSA----- 603  
 118577413 CRECRALVDQDINAANLFREVL----- 664  
 1003450287 CPTCERFYDQDENAARNLRRRQEVQAQV----- 536  
 1507071745 CSTCGELWDQDYNAAKNLAFSQKGGVK----- 567  
**488601079** CPI CGWEADR DYNASLNLIDVCMGRSRTPVEGEP LPCVISYR-EVIAGQVLSMKQEVPSV 402  
**297565028** CVA CGYSGAA DYVAAVNIAVRVWAAVNRP--YLGEASRVSLH-----GSPVGS 372  
**257060308** CNNCGNKCDADYNGAQNIKALCAIINRPG--GSGLSCKLKTNVQYIQLSLFEGLLKTS 398

1903609002 --- 596  
 1024922355 --- 607  
 1096423661 --- 603  
 118577413 --- 664  
 1003450287 --- 536  
 1507071745 --- 567  
**488601079** RAE 405  
**297565028** PRL 375  
**257060308** TSA 401

V-U2 family

1046552329 -----MAVKVFEFKIYYPH-----KDFQEQFNRWAYGLKKFYNFCLQQFELL 41  
 1019491369 -----MTVKVFEFKIYYPK-----KEFQEQFNRWAYGLKKFYNFCLQQFELL 41  
 428311397 -----MLTLEFKADFS-----LEQQAKIDRWLEINRSLWNMGLAALEDF 39  
 218248844 MFAIKSMSELVQHHTIQLKAYLS-----TTQTALFENWTDLSRPLYNLALGLLYEE 52  
 1030942420 -----MKVLEFKIHPPT-----EEQVSKIDQSLAACLLWNLSIALKEES 39  
 1305565200 -----MKTLEFKIYPT-----LAQSQTIDKWLDKLKWVWNTGLSLKLAG 39  
**488601079** -----MLISYRFRIYPS-----KTVQAKLNEQLELCRWLYNRLSEVNKA 40  
**297565028** -----MSLSVKCKLIPDAST---AEKLSRTVNQFANACNY---ALQVARR 40  
**257060308** -----MLESQPI TVACKLQVANTLAKEIDETMMVFCACDW-----VNQNTF 42

1046552329 DEYTYWDKLSKTRVPCCPVPWSLKLIETLDPN--PYLPELKNKHYS-YSNLIAPQDIPV 98  
 1019491369 DEYTYWDKLSKTRVPCCPIPNLKLIEETEPN--PYLPELKNKHYS-YSNLIAPKDI PV 98  
 428311397 DDFYSYVKGQKEYAPCCPIQYEQYRPLSEEEKACIPTHEKTS DRKYLAPFCRIISEKSRWY 99  
 218248844 QQ-RRWRTNQKF-----LKNYLDKSSQLTYLNEIENK---PDIYP 88  
 1030942420 KQ-RYYRKKHKF-----DEF--S---PEIWG 59  
 1305565200 RQ-KYYREKEIG-----DQV--I---PDGVV 59  
**488601079** R--KEGRRIRRE-----DTQSLIV 57  
**297565028** D--NIWNKF-----ALQRAVY 54  
**257060308** E--KMTNKT-----AMQSLVY 56

1046552329 ----IRNAPEARQYTLKKGETA--KDVFKRVKNPDQIVVTTAKPESGLDKWPRGWLGGV 152  
 1019491369 ----IRNAPEARQYTLKEGETA--KDVFKRVKNPDQIVVTTAKPESGLDKWPRGWLGGV 152  
 428311397 ----VKKLP---IYKVPTPAEK--KDSWGL-----PSNHDED---RKYSNCT 135  
 218248844 VEWHITKALPECDWLTKENEVRRKDNKSLA--CRTI---NRD-----GNFFT- 132  
 1030942420 LSY-----SGHYDEKEFKTLKDKKLLIGNPCKIAYFKKTSN-----GKEYTP 104  
 1305565200 LQWKWRKVVT E---DKK GKSTEKWEKVRLVG--TGV I---RPN-----GYPYC- 100  
**488601079** -----RIKREEKPELSKVYSKVLQ---MVN----- 79  
**297565028** -----ADLRAEY-----GLSAN---LAI----- 69  
**257060308** -----QDVRVNF-----GLSSN---LAI----- 71

1046552329 GYSQPPKQ-----DYQPSLIKFNPNSEKTKDAGILVKKETLENSNLPDEIKKVIDV 205  
 1019491369 GYSQPVKQ-----DYKPSLIKFNPNSEKTRDAGILVKKETLENSDLPDEIKKAILDVP 205  
 428311397 GYSCPIPRYGSVENPSWYEPMIRN-PTYKSGGLSLVSKTE-----NLPQWMKDS--DIP 187  
 218248844 ---FIRPYWHLEEPQKLAKFKCF---TN-----QWLI SCNLLTNYHLQKLL---NVN 175  
 1030942420 LNSIPIRRFMNAENIDKDAVNYLN--RK-----K---LAFYFRENTAKFI---GEIE 148  
 1305565200 ---EIRQHLNIEDPKYGG-----CEFYRSDKIPDFM---ADV 133  
**488601079** ---YQLRS-----NISS---LNE LRKKG-----VKVGWLRKY--TSP 108

297565028 ---RAI-----ARVGRKRG-----HKAGGFKAT--S D 92  
 257060308 ---QAARR-----VCAN---RKTAKQKG-----KVKKEFKPT--S S 100

1046552329 YKFRSGTLA-MLCTS YQEYLKRSRSGQKDLKRKPKYKRYRDR IETI IHPNPNAGSSK PAS 264  
 1019491369 YKFRGTLS-SLCTS YQ EYMKSRTGQNDLKRKPKYKRYRDR IETI IHPNPNAGSSK PAS 264  
 428311397 QRF RAGEMG-QLDTAWQEYLKRSRYGQSEVKRGRKPKYKRKRDKLQTLINTNPSANE -----241  
 218248844 MKVRSQSFISMNLMEAVKRY--Q-----KGD FRKLKFKSKRNPVISL CN-----KQT-N-RI 222  
 1030942420 TEFKKGFFKSVIKTAADAA--K-----KGI RGI PRFKGRDRK VETLVN-----GQP-D-TI 195  
 1305565200 TKFKAGVID-SLKKS VKAYVTP-----KHPGRKPKFKGRNDKIKSLVNLNAGGKS-K-EL 185  
**488601079** NSFKTLNFN---QSGFKID-----FD---R-----K- 128  
**297565028** YDQRILSVN---VDTETVSL S-----TVD---G-----RV 116  
**257060308** YDARIF SFR---ESD TVSVK-----LLN---S-----RQ 124

1046552329 KDACRLEEDN ILV-LPSFGKVKIKG D KRFRDNDGS-IPRVKVVK LCPSPG YIQ TA 321  
 1019491369 KDACRLEEDN ILV-LPSFGKVKIKG D RRFRDNDGS-IPRVKVVK LCPSPA YVQ TA 321  
 428311397 ---RLVENNIFAGIPKLGKVRCKG D KRWRNP DGS-IPRVATYK CCRPDA YIQ SG 295  
 218248844 KFD--PEANN CQLLGKEFGLIEFRG D HNRH---QGQIQPRNG--S TCCADG YLN VF 274  
 1030942420 KIK---SNGVIVSSKIGLLKVRG D DRL---Q GK-APRMA--K TCCATG YIQ TV 242  
 1305565200 KPEKIPGSNNGYVQFPKLGKIRVKG D FDRY---DWQ-EWGAA--R VI-EP SG YIH CV 238  
**488601079** KLSLSKVB-DIPI-----R HRSI---G---GKIKGVI KRTSGK YNI QA 169  
**297565028** KVPMRIAG--YQR-----H RRTA---K---SIQGGQ- VYRGDSS YIH WC 155  
**257060308** RIKL-LIE-NYQI-----G LKSK---N---PTSAT-- VYCRSGN YIH TL 162

1046552329 DINRSNKLFFKPLGA GID P LKEDN WITTDRFAVTKP WYRESEE LA LKELDAKKL 381  
 1019491369 DINRSNKLFFKPLGA GID P LKEENWITTDRFSVTKP WYRESEE LA LRELDAKKL 381  
 428311397 EVQRSFSV-KATNAS GID P LQYELSL-SDGTRIQQQCFYRKSEER A LQKLAKKLT 353  
 218248844 QVEH--KPIPDSDLQ GID P VTLT-LSDGKCSNQ RFLKENER LTV DKKLSRQT- 330  
 1030942420 ETDD--TIYKESDKC VGLD MAVAIFT-DDLGRQSEAKRYAKIQKRLN LQRQASRQK- 298  
 1305565200 DVPD--EPLPKSDKS GID P LSVIT-TDQGREVEPP LFRKQQA LRLR KASRQV- 294  
**488601079** EVDK--QPLPPTGRA GID V GTHFCV-DS DGN YFEHP CYLDRTLE I K VOKQLSRKQ- 225  
**297565028** EYDD--PPVLD PQM LGV D L VNIAT-DS DGETYSG- CHLNSVRH RHR LK KKLQKKG- 210  
**257060308** DEPT--QPEAKTDKV LGV D L R TDIAT-TSEGESWSG- QITAKRN IYA LATTIQKA- 217

1046552329 QRVILWLNHPDNSIERIKTIFP SIAKEALEKVKACKRPQYLHELVKNNELSTSGLNQLKH 441  
 1019491369 QRVILWLNHPENSTERIKEVFPGISKESIEKVKGCKRPQDLQDLVSNNELSTSGLNQLKH 441  
 428311397 ERLILWIHHPDRTIQEIRKNFFPISNESYEALRAAKTEAEVIK-----AIGASRLNTLKY 408  
 218248844 -----P-----GSKNWE-- 337  
 1030942420 -----D-----GSNNQR-- 305  
 1305565200 -----K-----GGCNQK-- 301  
**488601079** -----K-----GSKNRE-- 232  
**297565028** -----TKGAKR-- 216  
**257060308** -----S-----KG-TRSSRR-- 226

1046552329 FNFRDCEKVE SCYLFDKLLSASNKEI ELAQR RKLHE LKRRRRSHNQQQ TW TRKY-- 499  
 1019491369 FNFRDCEKVE SCYLFDKLLSVSNKEI ELAER GK LHE LKRRRRSHNQQQ TW TRKY-- 499  
 428311397 NIVPDAPPT---MKDKSPFSGAKQKALEKA RKLDR TSLQRNRHDHKI TTM VRNY-- 462  
 218248844 -----KT-----KKA LAKIHKQTADHRKYYNHKV ITH VNKY-- 369  
 1030942420 -----KT-----YAK LARVHE IARQRKGRNAQL LHK TSEY-- 337  
 1305565200 -----KT-----YRK LALHHE IRRSRNAFNHKL LTK VREY-- 333  
**488601079** -----KV-----RIG LAKLYE LLENQRNDFLHKL RYVNNY-- 264  
**297565028** -----R-----LKKLSG QETRF SNHVNHTL LKR VAKAQR 246  
**257060308** -----RC-----RQL LARLSG QERRFQKHINHEI L RQ VNNAVT 260

1046552329 --SIRI EDGL-QKNV---GKS KAKVSEDNRSFERNAQNSRTGMNK VLDAAIGGFISL 553  
 1019491369 --SIRI EDGL-QKNV---GKS KAKI SEDNRSFERNAQNSRAGMNK VLDAAIGGFISL 553  
 428311397 --GFIA EDGL-QDEKLR-KRTPKEREDGQGYEQTAGKRKSLK LADASPGRIAF 518  
 218248844 --GATA EDTK-LTNM-N-KRPKAEKREDGKGYEHNGAKAKAGLNQ FHDAGLGQLRAF 424  
 1030942420 --QSVI EDLK-LKNM-T-AAAKPKEREDGDGYKQNGKRRKSLNK LLDNAIGQLRTF 392  
 1305565200 --SGIV EDIK-IQNL-N-RKP KAKKREDGNGYEQNGAKRKA GLNK FADSALGDLISK 388  
**488601079** --DIMV EDLN-VKEMAENGSS TTLN-----RHITDSAW KF-----V--RL 302  
**297565028** TERAIA EDLQGIRERVRLRRPQ-----RATLHSW FF-----DLGQK 285  
**257060308** NKQATA EDLTGIRERTN-RKPRS K-----DKRLGNW LFY-----QLRQF 302

1046552329 ES K SKE-WGRDFKR LKPGKGKAYSQR- LVP L HENKEQKDI TNHQD-- N L NCGFTHR 608

1019491369 EDKSKE-WGRDFKRKPGK GKAYSQR- PVH-HENKEQKDI TNHQD-- N N CGFTHR 608  
 428311397 KQKADR-AGRVFSQ----HPAPYTTKE PV S-SMNEASYNVDDEGNRL L I CGWEC- 571  
 218248844 ES KANSYENRHIER /----RANYTSQK SR S-HTDSENRL-L---TQAS H LK CGLEM- 474  
 1030942420 ENKANE-RGRKIIR /----NPKHTSQT PN S-NIDKANR-V---SQSK K YS CGYEA- 441  
 1305565200 ET KCQD-TDREFVK /----AAHYTTVD SN S-AKIKKA---L---SQRTHR E CGHTE- 436  
**488601079** CEKAER-AARTVVK /----NPKNTSKR AM S-YIVNNLK-L---HDRT T I I CGWEA- 351  
**297565028** RYKAER-AGVPLVF /----DPRNTSRQ PA S-HAERANR-P---TQAL R Y A CGYSG- 334  
**257060308** TYKCIL-AGVKLIL /----NPAYTSL S H K L-VIGDR-----KGGK S I N CGNKC- 348

1046552329 SRDIVPGTINMILD----E-----FEEQQQ-----KNLLGIETE -----637  
 1019491369 SRDIVPGVNMILD----E-----FEAGD-----627  
 428311397 DRDVNSGVNIELA---Q-----FGNNP-----590  
 218248844 PADLNAAINIEQT-----487  
 1030942420 HADQNA AANILIRGLRDEFLRAIGSLYKF-----P VSMIGKYPGLAGEFTP--DL DAN 492  
 1305565200 GRDSNA AKNILLKGGKQ--LQTVYRAWAWEHGETRKP DSECE THCHQEGVQAPPEDEHSS 494  
**488601079** DRDYNA SLNILDVGM-----GRSRT PVEG-----EP---LPC 380  
**297565028** AADYVA AVNIAVRGW-----AAVNRP--Y-----LG---EAS 361  
**257060308** DADYNGA ONIKALGA-----I INRPG--G-----SG---LSC 375

1046552329 -----EQKIIWDDL SKECR--QAWRLREKW LSEN-----APGGGCQDEVNSDKPSN 681  
 1019491369 -----IQWDDL SKEAR--QAWRLREKW LSEN-----APGSGCQDEVTTDKPSN 668  
 428311397 -----HTVLSANAQ--RARFANSVW-----EIAHPEASTKPRW 621  
 218248844 -----AFGLDKS-----494  
 1030942420 QESIGDAPIENADRSTSKQMKQE-GNRIPTQSENDSQS LIFLSAPPQPCEDSHGTNNPKA 551  
 1305565200 QLT LVRTPAKGTQRGRGDV--KT-STPAKTTSKLDTVSDPNL DNKPDTRAPCTSSISPSN 551  
**488601079** VISYR-EVIAGQVLS---MKQE-----VPSVRAE -----405  
**297565028** RVSLH-----GS-----VPGSPRL -----375  
**257060308** KLKTNVQYIQLSLFE---GLGL-----LKTSTSA -----401

1046552329 --TRKSR-RRKK-----690  
 1019491369 --ARRKR-NRKKKT-----679  
 428311397 --KKTEK-RKKRK-----631  
 218248844 -----494  
 1030942420 LSDKASK-RKSKKSRGAI PENPDQLT I WDL----LD 582  
 1305565200 VENKIPKTKKNKRS AQSS SESFTQLT I WDTAGEI SFE 588  
**488601079** -----405  
**297565028** -----375  
**257060308** -----401

V-U3 family

1705264553 MPFILKQRGVRMITVRK LKI VCKDKE---FYDFFKWEQREQNKA L NIAI GLIHSSTV LRS 57  
 1018643584 -----MIIARKIKL I I IGENRDAQYKFI REERYKQNKALNVA M NHLYFLHVAK E 49  
 1077873159 -----MITVRKIKL TI MGDKDTRNSQYKWI RDEQYNQYRALNMG VTYLAVNDILYM 51  
 1077873155 -----MNCIKVAIKN C-----KELDYKVMSEKLRNIQY---LTC 32  
 1019720777 -----MSIAVKVMKYQI VCP-----VNVEWKVFETY I RTLAY---QSR 35  
 1017485595 -----MVCNKVVKI ALICD-QI-----DKDGKDVNYNDIYKL WDLQK---QTR 40  
 317133985 -----MTKVVKLAL ISNVTD-----KDGNKVEYNELNRC L WDLQK---ETR 38  
**488601079** -----MLISYRFRIYPS-----KTVQAKLNEQ I ELCRW---LYN 31  
**297565028** -----MSLLSVKCKLIPDAST-----AEKLSRT V NQFANACNY-----33  
**257060308** -----MLESQPI TVACKLQV-----ANTLAKEIDET V MVFACACDW-----36

1705264553 IDSGAEAQLKKSIGKLTQNI EKLGKELEKEKITDKKKEQLLKAINTNKEL IASKEKELKA 117  
 1018643584 KIRLLDNKFLQDEKQLQESINKLYAEKKVI KDEKKRNELEKKIEKQTNELKKLRSKSNKE 109  
 1077873159 NESGLEIRTIKDLKCEKDI DKNKKEIEKLTARLEKEQNKKNSSEKLD EIKYKISLVEN 111  
 1077873155 KASNKVMQMY YWENQKI DIKNKTGEYPDDKELFGK-----TYRNV-----73  
 1019720777 TIGNRTIQKI WFDNLSLNHFKETGEYPSAQQLYGCTQK-----TISGY-----79  
 1017485595 EAKNKVIRLCWEWSGYSSEYFKTHEEYPKDKEIFGI-----SLRGY-----81  
 317133985 DLKNAV VRECWEWY GFTNDYKLN EEPNERDY LKKAKSDGT I KDYALDGF-----89  
**488601079** RL LSEVNKARKEGRRI RE-----DTQSL-----55  
**297565028** --ALQVARRDNIWNKF-----ALQRA-----52  
**257060308** ---VNQNTPEKMTNKT-----AMQSL-----54

1705264553 GEEFRCGIDKKFNELYMNKT I YHVI DSIC-----DFKYKRTIELVLRQKV 162

1018643584 ADKVLQEAIKINLSST----TREVISKQF-----ELIS-DTKDRITQKV 148  
 1077873159 KIEDYKLLKIVELNKIIEETQKERMDIQKEFKKEYVDDLQVLDKIPFKHLDNKLVLTQRI 171  
 1077873155 -----VEGEAKTIM-----NTINTSNVQTNAII 97  
 1019720777 -----YDQKKEY-----QDINKANMTTIQKT 103  
 1017485595 -----YDRKGDY-----NLYS-GNLQSAEIA 104  
 317133985 -----YAKYSKKY-----NLHS-GNYQTLRDA 112  
**488601079** -----VRIKREEK-----PELS-KVYKVLQMV 78  
**297565028** -----YADTRAAY-----LSANLA 68  
**257060308** -----YQDTRVNF-----LSNLA 70

1705264553 KQDYSNSFTD-IVTGKVS LQNYKSTFPLMIDGSCISILKEVDELDVNGYKIKIMLGYE- 220  
 1018643584 SQDFKSDLKHGLLSGERVLRITYKKNPPLLRG--RALNFYREGKDM----IKWYGGII- 201  
 1077873159 KADIKSDKSNGLLKEERSIRNYKRNFPPLMTRGRDLKFKYD-DNDD E----IKWMEGIK- 225  
 1077873155 MKKWNTDKKE-VLSYQKSLPNFKLNMPIYIKNKSFSIVKGTSGYEI----CSIFNKSQD 152  
 1019720777 LKNWNSRRKE-IWRBERKQNS----- 123  
 1017485595 YKEYKNSLKD-VLRGDKSIIINYRENQPLDIKNKAIQLLYENDNFFR----VALINKDKQ 159  
 317133985 CGSFKNLKE-ILRGDKSILSYRADQPLDIKKTCIGLEYDKDNTNTY Y----VTLVLLNKN 167  
**488601079** NYQLRSNISS-LNELRKGKGVKVGWLRKYKTPNSFKTLNFNQSGFKD-----FDRK-- 128  
**297565028** IRAI-----ARVGRKKGHKAGGFKATSVDYDQRIILSVNVDTETS----LSTVDGR-- 115  
**257060308** IQAIRRVCAN-RKTAQKQKGVKVEFKPTSI SYDARIFSFRES DWT S----VKLLNSR-- 123

1705264553 -----LDIILGKRENSLELQKTLCITGDYKICASS-ORDANNVIFN TLD 270  
 1018643584 -----FKCMGQHKNAPELKATLSVLEGSYKVCDS--SSISVGKELIILN SLD 248  
 1077873159 -----FKVILGNRIK-NSLELRHTLVIEGKYKICDSS-OFDANNLIILN TLD 274  
 1077873155 LKR-----LTFIDKLDG---NKKATLVIDLTYKQGAGQ- IKDKGKQWYFI SFG 201  
 1019720777 -----MKVLDIIDSTYAKGAC--LHKKWKWYLS TYK 157  
 1017485595 KELNFKDCSVRFKLLVKDD---STRTI LRCFDEVYTTASKIYNKQKQWYIN GYK 215  
 317133985 GVKHYNISDFRFKIVTKDN---STRTI LRCFDGVYGISASKLWNRKRSQWFLN CYS 223  
**488601079** -----KLSLSKVGD---IPIRLRSIGGKIKGVI---KRTSGKQWYAIQAE 170  
**297565028** -----VKVPIRIAG---YQRHLRTAKSIQGGQ---VIRGDSWSWYIHWCE 156  
**257060308** -----QRIKL-LIGN---YQIGLRSKNPTSAT-----VKRSGNYYIHTLD 163

1705264553 I-PIEKDYKPVKGRVCGVLDGKYPAYMCL---NEDTYKKEAVGSI----NNFLRI-- 320  
 1018643584 IGEVDTNVSCCKGRVIGVDLGMKVPAYMSI---NDKPYIRKALGSL----DDFLKI-- 299  
 1077873159 I-PIDIVNKKVSGRVVGVDLGLKIPAYCAL---NDVEYIKKSIIRI----DDFLKV-- 324  
 1077873155 F--ENKKRELDINRIIGIDVGI TNLLTMQI WDCNLKEWDRLAWN CMVDGRELMHY-- 257  
 1019720777 S-NIKEELKFDEDLIMGIDMGKINVL YFAF---N-KGLVRGAIIG----EEIEAF-- 205  
 1017485595 F-TKEIDKTLDKDRILGVDLGVINPLVASV---Y-GSYDRLIIG----GEIDKF-- 263  
 317133985 F-DKVEVKELDKKILGVNLGVYYPYASI---S-GEKDRLAIG----DEIEEF-- 271  
**488601079** V---DKQPLPPTGRAIGIDVGI THFC-----VDS DGNVFEHP----KYLDRT--LE 212  
**297565028** Y---DDPPVLDPQGLGVDLGIVNIA-----TDS DGETYSG----KHLNSV-- 197  
**257060308** E---PTQPEAKTDKVLGVDLGRTDIA-----TTSEGESWSG----KQITAK-- 204

1705264553 QIQERRKLLDKELLT---NG---BKGRTKITQA-LEKRENEKNKTYNHAIKRVVGF 374  
 1018643584 QIQKRRRNLDKTLVNV---KG---BKGREKILQA-DRKDKKNKTYNHFLKNVGF 353  
 1077873159 IQQSRRRRLQIAIQSA---KG---BKGRVNILQA-ERFAEKKNKTYNHFLKNVGF 378  
 1077873155 KIEARRKSLKNSKISEKNTGKABHGISKIQA-ADV RNCKKNKDTFNHKYRYA QF 316  
 1019720777 KIEHRRISLRLQGGKYCSGNRI---BKGREKIKP-ADVNDQAKNATN HKYNYV QF 262  
 1017485595 RVEANKVQMLKQGYCGDGRI---BHGNTNKP-AYNEDCSRDTVNHKYKAV QY 320  
 317133985 RIEARRTALKKQAAVCGDGRI---BHGNTNKP-AYNEDCSRDTVNHKYKAV QY 328  
**488601079** KIKKVQKQLSRKQK-----BKGNREVRIGLAKYKLENQRNDFL KLYY MN 263  
**297565028** RHRRLRKKLQK-----KG---TKGAKR---LKKSGKTRSNHVHFLKRVAK 243  
**257060308** HYAKLRRTIQKKAS-----KG---TRSSRRICRQLLARSGKRRDKHIHPIKQV IN 257

1705264553 ARKNKCEYINLEKLT-----KDGFGDSI L NWSYFEKMEY 412  
 1018643584 AKDNLAEQINMFLA-----GAGEDK-----NII L NWSYYQKQF EY 392  
 1077873159 AVSNQAEQINMLLS-----KQETQN-----KSI L NWSYYQKQTM EY 417  
 1077873155 ATRNNGCIGDMENLA-----KFTTEEVK-----EKM L NWSYYDKSK KY 356  
 1019720777 CLKYNCGTIDLEDK-----GTSKE-----QTF L NWTYFDK EKN 300  
 1017485595 AVKNNCGTIDLEDK-----GTTQNK-----ERY L NWTYFDK EY 360  
 317133985 ATKNDCGIDLEDK-----GTTKNS-----EGF L NWSFYDKSK EN 367  
**488601079** Y-----DIMVVDLN-----VKEMAENGSSSTTLNRHITD-SAVSKV--RL CE 304  
**297565028** ADRTE-RALALEDLQ-----GRERVRLLRPQ---RATLSAFFDQKRY 287  
**257060308** AVTNK-QALALEDLQ-----GRERTN-RKPRS KDKRLG-NWAEYQKQFTY 304

1705264553 KAKSKGIEVRYIDPCFTSQKCSKCGYIDKENRE---TQEDFICKKCGFKLNADHNASINI 469  
 1018643584 KAKREGIDVQYVDPYRTSQMCSKCGNYEPGQRE---SQEKFI CKSCHLEINADYNABONI 449  
 1077873159 KAQREGIKVKYIDPHYTSQTCSKCGNYEEGQRE---SQADFI CKKCGYKVNADYNARNI 474  
 1077873155 KAEEQGIKVNFIKPSYTSKRCSLCGAIDDRNRDCNNQSKFQCVVCDHKEHADINAANKNI 416  
 1019720777 QANQYEVKVVKIDPFYTSQRCSKCGYIHKNNRQ---DQSTFECQQCSFKVHADYNAANKNI 357  
 1017485595 KAKALGIEVKYKKNPKYTSQRCSKCGHIAEENRP---EQKTFKCVKCGFKVNADYNABONL 417  
 317133985 KAKERGIKVVYIEPAYTSLRCSKCGCIHKDNHP---TREQFICQECGYRVLHDYNAABONI 424  
**488601079** KAERAARTVVKNPKNTSKRCAMCGYIVNNLKL---HDRTFTCPICGWEADRADYNABONI 361  
**297565028** KAERAGVPLVFDPRNTSRQCPACGHAERANRP---TQALFRCVACGYSGAADYVAAVNI 344  
**257060308** KCILAGVKLILVNPAYTSLSCHKCLVIGDR-----KGKGFSCNCGNKCDADYNGAONI 358

1705264553 ARSKEFIK----- 477  
 1018643584 AHSTKYITNKN--QSEYLKKLQQT-----TKLEKYS 478  
 1077873159 AMSNKYITKKEESKYKIKESMV----- 497  
 1077873155 ALPDIEELIES--KIG----- 430  
 1019720777 SVYNIEKVIQK--QLELQEKLNLT-----KYKERYIEQMENIN 393  
 1017485595 AIKDIDKIIIEQ--YYNKG----- 433  
 317133985 AVKDIDKIIKA--ELEKTEPEKKT-----EEKPEK 453  
**488601079** LDVGMGRSRTPVEGEPLPCVISYR-EVIAGQVLSMKQEVPSVRAE 405  
**297565028** AVRGAAVNRPT--YLGEASRVS LH-----GSVPGSPRL 375  
**257060308** KALGAIINRPG--GSGLSCKLKTNVQYIQLSLFEGGLLKTSTSA 401

V-U4 family

1040961339 MSYLCARGRFNLSGFSTGSMGVLPVRASLFFALLFTTLHGARI SAHWYGMISKENDHTVTCI 60  
 1405224212 -----MSSERAPKL-----RNVVTQQAY 18  
 1206162758 -----MGTEG-----ALTH--RVV 12  
 1009979974 -----MTSTTLAPE-----EPLMVFRGA 18  
 451770599 -----MTTARANEIPTCQTQHLRSTHMTDV-----E--L--SAY 30  
 1305448890 -----MAEV-----L--RAF 8  
 1706614983 -----MAEKTGTDA-----GTMN--RAY 16  
 1706842133 -----MPLNGWTMLAQVEVRAMTTTTGTDL-----APRL--RAF 32  
**488601079** -----ML--ISY 5  
**297565028** -----MSL--LSV 6  
**257060308** -----ML--ESQ 5

1040961339 KICIEP---N----KAQRAQFASFAGSARWAYNFALAIKIGYQKR-WFEARKQFIESGL 111  
 1405224212 KYALEP---T----PRQQCAFSSHAGAARFAYNWGIARVADSLDA----YAEQKAAGI 65  
 1206162758 RVCLDDAALT----PDQRTLLDRHAGTARAVWNWGLAARNAQQDALMAHVRAVALEQAA 67  
 1009979974 RFRLDP---T----GEQQGILSQQAGAAARVAYNMMCTLNKDILEA-RSQLYSTLIKDGK 69  
 451770599 RFALDT---T----PAQLTMLRQHAGAARWAYNHALGVKFAALDE-RKTVIAGLVEQGL 81  
 1305448890 KFTLDP---T----RAQVGALQQHAGAARWAFNWALGEKVA AHRE-WRRQV GALLAEGV 59  
 1706614983 KFRIDP---N----QAQKAELMRCVGAARYTYNLLNAYNLQILRN-EQEYRNRNAEGA 67  
 1706842133 KHRIDP---N----PAQATLLAQYAGAARVAYNMLIAHNRAALAA-GAARTELAETGL 83  
**488601079** FRRIYPS-----KTVQAKLNEQLELCRWLYNRLLSSEVNKARKE-GRRIRRE----- 50  
**297565028** KCKLIPDAST----AEKLSRTNQFANACNY----ALQVARRDNI-WNKF----- 47  
**257060308** PITVACKLQVANTLAKEIDETMMVFAACADW-----VNQNTPEKM-TNKT----- 49

1040961339 DEKAAGKKASEQVGRMPNYM-----SIATNEWTQLRDEV----- 145  
 1405224212 D-----EPDVKFPGFHFDLC-KMWTAWKNTAE--WDRHTGTQTTTGV--- 103  
 1206162758 SDETA AE L L D D R D W R T A T I K A A P D E L R R P L R A A T L G R A F -----TAETRPD 115  
 1009979974 TKDKAKKELKAAAKEDPSLAIVWARDFDKNYITPERNRHK--HAAQRI AAGENPVDVWN 126  
 451770599 DPKTSAAQAPK-IPTKPAIQ-----KALNTTKGDDR-----ISAAGD----- 117  
 1305448890 AE EQARKQVRVPVPTKPTIQ-----KRLNSFKGDSR-----VQDLDPDGVLG-- 100  
 1706614983 DYETINGEIRKLRKDPAYKFLGHAEYEKRYLTPEKQRHE--AIAQAITDGADPAVWWS 124  
 1706842133 AGPELAARMKAERAADPTLRVASYSQSYATAHLTPLIRRH--EAAAAIAAGADPAEAWT 140  
**488601079** -----DTQ-----SL-----IVR 58  
**297565028** -----ALQ-----RA-----VYA 55  
**257060308** -----AMQ-----SL-----VYQ 57

1040961339 -----CPWY---PEVPRRVFVGFQRADAFKNWFDS--KSGRRS----- 180  
 1405224212 -----PWV---ASNFGVGTQALRDAACWQRFRA----RKT----- 134  
 1206162758 ---SRF-----A--WWAVERHGVNRFVAVSSQLQALDAFDRYYRD--TGGHRSARRARP 162

1009979974 PDEERF-----NEPWL----HTANRRVLRSGQKQYEQALDNFFKS--QNGSRA----- 168  
 451770599 -----CPWW----HTVSTYAFQSAFADADTAWKNWLAS--LTGKRS----- 152  
 1305448890 ---PRR-----PCPWW----WEVKT YCFQAAMADADTAWKNWLSS--LTGARA----- 139  
 1706614983 -ETERF-----AEPWL----HTIARRVLVSGIKNADKAWDNYNKS--RMKQRA----- 165  
 1706842133 -D-ERY-----AEPWM----HTVPRRVLVSGLQNAAKATENWMAS--ASGTRA----- 180  
**488601079** IKREEK-----PELS-KVYSKVLQMVNYQLRSNISS-LNELR-----93  
**297565028** DLRAEY-----GLSANLAIRAIT-----ARVGK-----77  
**257060308** DVRVNF-----GLSSNLAIQAIRRVCAN-RKTAK-----85

1040961339 ---BAAMBWPKFKSKSKSREBFVIA-NDVQPAFVANLNRYI-----KTGELA-- 223  
 1405224212 ---GARAGRPRFKKRGRARDSDH-----GDGLR-- 161  
 1206162758 RKDGRPAWPRFKKRGRATDAFAF--NLV-----VAGQDPWR 198  
 1009979974 ---GDKMGKPRFKTKIRSTDSDHDAVDVSSSTTLIRDIGPKDHARY-----KTGEASTG 220  
 451770599 ---G-PIGAPRFKSKHRSRDSDFRH-HDVN-----NPTIRP-- 183  
 1305448890 ---GDRVGYPRFKKKGRARDSDRH-HDVK-----KPGIR-- 170  
 1706614983 ---GARMGIPRFKRRKGVSRDSDFP-HETT GAYGAYYHKKDPEYARRKVQLKRRGISAKP 221  
 1706842133 ---GARVGLPRFKKKGRSRDSDFP-PAPEVIGAGGTPY-----KRGEPRRG 222  
**488601079** -KKGVKVGWLRKYKTS---PNSFKTLNFNQSGFKID-----FD-----RK-----128  
**297565028** -RKGHKAGGFKATSV---DYDQRILSVNVVDTEVS-----LSTVD-----GR-----115  
**257060308** -QKGGKVKFKPTS I---SYDARLFSFRES DWTVS-----VKLLN-----SR-----123

1040961339 -DMDYRHIKVPKCEVRLTPGSAGQLKDLGRTML-----AE 258  
 1405224212 -IVDAKHVNLPKIGIVKTFEATRKLARLAKGSVPCPTCRATGKITDSASGKVKKCS DCK 220  
 1206162758 VIEGAHRIVKVPKSLGSLRVHENTKRRLIARG-----230  
 1009979974 IADYRHHVRLSHLGTFRVFGSTKALVRQLDRG-----252  
 451770599 -DDGYRRIIVPRLGSLRVHDSTKRLKRAIDRG-----214  
 1305448890 -LAGYRRIIRLPTIGEVRLHDFGKRLARLIDRGR-----202  
 1706614983 TITDYRHHVRLASLGVIRTHNTTKPLVKA VRAG-----253  
 1706842133 VITDHRHLRLASLGTIRTYDKTSRLVRACRRG-----254  
**488601079** -----KLSLSKVG D-----IPIRLHRSIGGK-----149  
**297565028** -----VKVPMRIAG-----YQRHLLRTAKSI-----136  
**257060308** -----QRIKL-LIGN-----YQIGLLKSKNPT-----144

1040961339 AKTGELITRITSGTISR-LEDK WYVSLVISG---PFVP-DA-----ISIRQRR 302  
 1405224212 AAGSRPAARIVRGTVARDSAGK WYLAITVEL---VREV-RT-----APIRQLA 265  
 1206162758 ---BRPTSARFTR-TGGK WYMSVVAL---PATAASTVLS PAGAPRAAAPIAQTR 279  
 1009979974 ---GRIKSCTISR-SADK WYVSLVEL---PIEIARS-----TPKQYK 290  
 451770599 ---AVIQSVTISR-GEHK WYASLVKA---PAA--HA-----APIRQRQ 250  
 1305448890 ---AVQSVTVAR-CEHK WYASLVCKV---DQSV-PQ-----RSIAQRR 239  
 1706614983 ---AEIKSFTISR-ADK WYVSLVEL---TRP--ST-----APIAQRS 289  
 1706842133 ---AQIRSMISQ-AGGK WYASLVAD---PTPI-RT-----GPSRRQRA 291  
**488601079** -----IKCVI-----IKRT-KSGK WYAIWQAEV---DKQP--L-----PPT-----179  
**297565028** -----QGGQ---LVRG-RDSSWYIHLWCEY---DDPP--V-----LDP-----165  
**257060308** -----SAT-----LVKR-KSGN WYIHLTDE---PTQP--E-----AKP-----172

1040961339 NBYVGVDLGSGRFYAITSE-----LSIINP FVSKYEQEAAN 343  
 1405224212 GEPVGVDFEV-RQVAILST-----QLVDNP HLESHLRVKTAQQ 305  
 1206162758 AGLVGVDLGI-KTLAIMSD-----TLVANA HGRAAARLAALQ 319  
 1009979974 AGAVGIDLGV-KSLAALST-----EII PNP FLRTADKIKILQ 330  
 451770599 AGTVGVDLGV-HHLAALST-----DIIDNP HLAAGQKLTAAQ 290  
 1305448890 RBRVGVDLGV-KHLAALSD-----PLHPYDRASLYVENP HLRRAAQLAALQ 287  
 1706614983 AGAVGVDLGV-RYLAALSD EQAPQRFAPYPLEFTSDGAPTLANP WARA AEKLVILQ 348  
 1706842133 NBYVGVDLGV-KHLAALST-----EVIDNG PGARQAAITLQ 331  
**488601079** GRAIGIDVGI-THFCVDS-----NYFEHP YLDR TLEIKVQ 219  
**297565028** QMGLGVDLGI-VNIATDS-----ETYSG-GLNSVRHHRILR 204  
**257060308** DKVGLGVDLGR-TDIATSE-----ESWSG- QITAKRN YALRT 211

1040961339 ALAKTA---KG---SARKKALARLRVHARSALAKGFSHQSAWISQF---AGAV 393  
 1405224212 ALSRCP---PG---SRRRAKAQQRGLHARVRHLKNSLQQATSAHQH---SVAV 355  
 1206162758 RAARQQGPRKGAAPSKGWVATQRTITLQHDTAARAGLVYE TKTLAGY---AAAI 375  
 1009979974 KIARCQ---KG---SKNSIRLKRRLARCHHELALQAGYLNE TSMSSSF---SAAI 380  
 451770599 ALSRTE---KG---SNRRRAAARVGRHHEITERATTLHTTKHATNW---ATAI 340  
 1305448890 ALARTQ---KG---SKRRAKAVRRVGRHHEVAVRSTLHQTKRATGF---AEAV 337  
 1706614983 ALSRAQ---KG---SKRRARIVQQIARHHLVALRSGSLHQSKRATGY---TLGL 398

1706842133 AYARTQ---P E---SNRERVRRLAALQHGIALR RAGLLHQ STR TDF---AV AI 381  
**488601079** QLSRKQK---GSKNREKVRIGALYEKLENQ IDFLHK SRYVNNY---DI V 269  
**297565028** KLOK---K E---TKGAKRR---LKLKSGKETRFNSNHVNHT SKR YAKAQRTERA AI 253  
**257060308** TIQKAS--K E---TRSSRRRCRQLA RLKSGKERRFQKHINHE SRQ LNNAVTNKQA AI 267

1040961339 EKFDLASMLAS--AKGTV EKPGKNV---DVKARFNAH A) --V IASTIDK YK GKR 444  
 1405224212 EGWDVQQT AQH---ASPKNLPKQI-----RRNRNRA LD) --T IGAARWQ S AW 402  
 1206162758 EDLNVAGMTATPAARPDPDRPGVYLANGRAAKSGLNRA LD) --V FGEFRRQ K PM 432  
 1009979974 EDLNVAGMTSS--ARBTVENPGKNV---KQKAGLNRS LD) --I PGRIRTL K TD 431  
 451770599 EDLNVAGMTRS--ARBTI ONPGTNV---RAKAGLSRA LD) --T PGELRRQ K GW 391  
 1305448890 EDLHVAGMTRS--AKGTI DAPSRNV---RAKAGLNRS LD) --T PGELRRQ K CW 388  
 1706614983 EDLAVAGMTAS--AAETI EAPGKNV---RQKAGLNRS LD) --A FSTLRRQ K SW 449  
 1706842133 EDLNVAGMTRS--ARBTLEAPGRNV---AAKSGLNRA LD) --A LGMLRRQ K SW 432  
**488601079** EDLN-----VKEM-----AEN-GSSTTLNRH T) SAW KFV--RL E ER 308  
**297565028** EDLQ-----EIRER-----VRL-RRPQ---RATL-HSW FFDLGQK K ER 291  
**257060308** EDLT-----EIRER-----TN--RKPRS KDKRLG--NNW FYQLRQF K IL 308

1040961339 DSCRVOV VNTLDNS SITTAKCGH--TCVCGPEQ IT T) DCGY-NAP L SA Y QL 501  
 1405224212 YETT VVVTDRHAPT ERQCSACGTVKATPIPPPTQDE R) PACGT-SL DR T V AV 461  
 1206162758 YEAQLEIARFAPT SKT CSTCGA-VRAKLRLE D T R) HCGI-VI DR L AA NI AAL 490  
 1009979974 RGEVLEQVIDRFFPS S QL SCSGS--KTTIPLAQ I H) VCGG-VI DR L AA NI VYE 488  
 451770599 YGSTLAICDRWFPS S QQCEK V--RTKLRLSQ V T) PCCGYPI DR L AA NI AAY 449  
 1305448890 YGSR L AVLDRWWPS SKTCSACGR-QNPRLT LAD T H) GCGI-RI DR L AS NI ATH 446  
 1706614983 YGSQVOI DRFFAS S QTC SACGARA KTKL DLRV V E) ACGV-RI DR L AA NI RAE 508  
 1706842133 AGSQVKMIDRFAPS SKACSRCGT-VKSTLSLAE T E) ACHL-VI DR L AA NI RAW 490  
**488601079** AARTVVKVNP-KNTSKRCAMCGY-IVNNLKLHD T T) ICGW-EA DR L AS NI LDV 365  
**297565028** AGVPLVFDVDP-RNTSRQCPACGH-AERANRPTQAL R) ACGY-SGAA D V L A NI AVR 348  
**257060308** ASVKLILVNP-AYTSLSDHKDLV-IGDR--KG I G S) INCGN-KC D L GA NI KAL 362

1040961339 TVG-----FDELGLDMTASLTPD--TGKRPIAFMTS --AH----- 532  
 1405224212 AQH-----HDAPSGGESKNARGENTRPT--APRRNQFSAK--REPRSRPPGRGQTGTP 511  
 1206162758 HQA---LGTS PADAGDAKRDRDHEGDRERSVILVSQDLGPPR--SAERVTDS SPPTRAA- 544  
 1009979974 KRL-----VEQKCEHSAPEGAEDKRPWSVHL PSTQYVDGLYTRKRQGPSGHSS----- 537  
 451770599 AVAS-DTGETLTARRDTAEAPTRVGRRRGAVDAGRPHRETGA--ATPAEQ PAGHPKHADQ 506  
 1305448890 ALA--DTAPPVAPDRGETQNARRAGTRPT--GPRAGRHPAT--KREDTAPAVPPQRSNP 499  
 1706614983 VRM---YEAQLAPMGES LN GRGV TSDAAVS VVLGDAALDA--SRPAAMGGGSP----- 558  
 1706842133 VQEERGAGVELARGRRRESRNGRGA AVSGP-PSGGAAGQGRGS--VKPAPQVGMSSRATG 547  
**488601079** MGRS RTP--VE-GEPL--PCVISYR-----EVIAG--QVLSMKQ--EVPSVRAE- 405  
**297565028** WAAVNRP-----YLGE--ASRVSLH-----G--SVPGSPRL- 375  
**257060308** AIINRPG-----GSGL--SCKLKTN-----VQYIQL--SLFELG--LLKTSTSA- 401

1040961339 ----- 532  
 1405224212 GT----- 513  
 1206162758 ----- 544  
 1009979974 ----- 537  
 451770599 RTLPLVS----- 513  
 1305448890 LALPPPPTGYEQVTLF----- 515  
 1706614983 ----- 558  
 1706842133 WSSQPPSTEGESAVRGASALAR 569  
**488601079** ----- 405  
**297565028** ----- 375  
**257060308** ----- 401

V-U5 family

1002781834 -----MSTIT-IQCRLVAP EATRQALWQLMAQKNTPLVSELLRQVAQH P D FETW 48  
 257060041 -----MSTIT-IQCRLVAP EATRQALWQLMAQKNTPLVSELLRQVAQH P D FETW 48  
 1405885249 -----MSVIT-IQCRLVA E EDSLRLQWE L MTEKNTPFINE ILLHLGKH P E FETW 48  
 440680311 -----MSVIT-IQCRLVA E EDSLRLQWE L MSEKNTPFINE ILLQIGKH P E FETW 48  
 1111222001 -----MTQIT-VQCRLVATE TTRQELWQLMADKNTPLINE LLKQVAE H S DFEAN 48  
 1016058386 -----MSVIT-IQCRLVA E E DTLRQVWE L MTDKNTPLVNE ILLAQV GKH P E FETW 48  
 1002781021 -----MSQIT-IQCRLVA E EPTRQTLWQLMAELNTPFINE LLKQVAQN P D FEQN 48  
 1002400088 -----MTLKT-LECRLYAPS DTLRYLWQLMAEKNTPLINE IINH LSE H P DFDN 48  
 1002400093 -----MTHITVQCRLIAP ESTLQHIWK MMAQQQTPLINDLLHD INT H P DINTW 49

1000428792 --MCFVWYFIEMSQKTIQCRLIASSTRQKLVQLMAESNTPLNELLQQLSKPDFEK 57  
 1004799941 -----MSVITIQCRLIASSTRSYLVQLMAQKNTPLNELLEQLGIHPEI 48  
 1004798910 -----MSQITIQCRLVASSTRHQLVQLMVDLNTPLNELLQVAQPEFE 48  
 1002125473 -----MSQITIQCRLIASSTRQKLVQLMATLNTPLNELLEQLGKPDFE 48  
 1007062327 -----MSVITIQCRLVADSTRRHVLVQLMAEKNTPFANELEQLAQPEFE 48  
 1007109870 -----MSQITIQCRLVASSTRQQLVQLMAEKNTPLINELEQLQIGKPEFE 48  
 428305730 ----MSDQTSQNNELTIQSLVAPSTRCLFVLVLMVNV-ELINLHNTPDFD 54  
 1030021203 MSRDRQKKSTSPIHRTIRCHLHASEDVLKRVWEEMTQKNTPLIVQLLKS VSEQPEFETN 59  
 17230183 MSRDRKKGSKSPSLRTIRCHLHTKEDVLKRVWEEMTQKNTPLIVELLKS VSEQPEFETN 59  
 1206817639 -----MSVITIQCRLVADRTLQHLVQLMAEKNTPLISLLQLQIGKPDFE 48  
 1300380544 -----MSVITIQCRLVADRTLRYFLVQLMAEKNTPLINELLQQLGQPDFD 48  
 220908491 -----MSMYTIRCHLHASEPVRRLVQLMAGSNTPLVNLQLSQPDFE 48  
 1085045623 -----MSKITIQCRLVASSTRQYLVQLMADIYPTNEILQREDDNE 48  
 1085056708 -----MSQITIQCRLIASSTRQKLVQLMAHLNTPLINELLQQLSKPDFE 48  
 1406824382 -----MSQITIQARLISESTRNQQLVQLMADLNTPLINELLQQLGHPDFE 48  
 428311644 -----MSVITVQCDLKAATKDSLRLVQLMVEKNTLVNELLQNTPDL 48  
 1085030414 -----MSQITIQCRLVADSTRARQLVQLMAEINTPLINELLQQLGQPDFE 48  
 1300485477 -----MSVITIQCKLVADSTRRALVQLMAEKHNTPLINELLQQLGQDSRE 48  
 428312908 -----MSQITIQCRLVADSTRQHLVQLMAERNTPLINELLQQLGQPDFE 48  
 1016001624 -----MAHVTIQCRLIASSTRQFLVQLMAQKNTPLINEILRQKHPDFH 48  
 1507700957 -----MSQNAIQCRLIASSTRRQQLVQLMAEKNTPLINELLQQLAEPEL 48  
 428306136 -----MSQITVQCRVADSTRHHLVQLMADLNTPLINELLRQAQPEFE 48  
 1019531886 -----MSQITIQCRLVADSTRQTLVQLMAELNTPLINELLQQLAQPDFE 48

1002781834 RQQGLKEAGI IKKLCEPLKKDPRFYE QPARFYTSAISLV DYLKSWLKVORRLQNKLEGD 108  
 257060041 RQQGLKEAGI IKKLCEPKDPRFNE QPARFYTSAIALVDYLKSWLKVORLQKLEGD 108  
 1405885249 LEKGRIPAESLKTGLNSLKTQEPETG QPGRFYTSAIALVDYLKSWFALQKRRKNQLEGK 108  
 440680311 LEKGRIPAELEKTLGNSLKTQEPETG QPGRFYTSAITLV DYLKSWFALQKRRKQKLE 108  
 1111222001 RQKGIPTGT IKQLCEPLKTDSTRFIG QPGRFYTSAIALVSYLKSWLALMKRLQYKLEGK 108  
 1016058386 LEKGIPTFEFLKTLVNSLKNQERFSD QPGRFYTSAIALVDYLKSWFALQKRRKQKLEGK 108  
 1002781021 RQKGLQKSVIKQLGDKLKKDPRYLG QPARFYTSGISLV EYLFKSWLKVORLQKRLDGD 108  
 1002400088 FKAKQIPKSAISDINCNDLKSQENYQN QPGRFYSSAISLVTHYLFKSWFALVKQLRRLEGK 108  
 1002400093 LTANQLPSKLVETLAQPLKTDSPYQGLPGRFITSAIILVKEYASWFAIQTKRRLSLEGK 109  
 1000428792 RRNGKLPSTVVSQLCQPLKTDPSFTG QPSRFLYSAIHIVDYLKSWLTIQKRLQQLDGD 117  
 1004799941 LKKGKLPDGVVKPLCDSLITQESFAN QPKRFYKSAIEVVEYLFKSWLALQKRRQOTIDRK 108  
 1004798910 RQKGRHPAKIVKELCEPLRTDPRFIG QPGRFYTSAIATVNYLFKSWFALMKRSQSLEGK 108  
 1002125473 RQKGLPTTVVSQLCQPLKTDPRFVQPSRFLYSAIHIVDYLKSWLTIQKRLQQLDGD 108  
 1007062327 VKNSRVPATVIKELCDSLKNQELFAG QPGRFYTSAITLVNYLFKSWLAVNKRLQKLEGK 108  
 1007109870 RQKGRHPGTIVKELCEPLKTDPRFIG QPARFYTSAATSVNYLFKSWFALMKRYQSLEGD 108  
 428305730 LTQCAPASVINSFIKTAKTQSPYREMP RFTSAQNLVNEFKSWFEQRLKRLSKLE 114  
 1030021203 QEKGTISKKEITKLRKALTNDSDLQQSGRLGSSADSLVTEVYTSWLTLSQIKKKQKEGK 119  
 17230183 KENGLITKKEITNLRKSLTQDS-----GRLYSSVDNLVQEVYSAWLTLYQKRRKQKEGK 113  
 1206817639 LKNGKVPKDTIKILCDSLKTDSTRFAG QPGRFYTSAISQVKEYKSWLTIQKRRQKLEGK 108  
 1300380544 VQAGKMPKTVENLCKSLDREPFAN QPGRFYTSAVALVKYLFKSWFALQKRRADRLEGK 108  
 220908491 QRKGDISKSSVEALCEPKET--YGP QPGRFYSAILRVYTFKSAQKNRRYRE 106  
 1085045623 RQSGKIPASVFEDYRKTLLKTESRFQGM PGRWYVAGREEVKRYKSWLALRRRLRNQLAGD 108  
 1085056708 RKNKLPSTVVSQLCQPLKTDPSFTG QPSRFLYSAIHIVDYLKSWLTIQKRLQQLDGD 108  
 1406824382 QKGLPSTVVSQLCQPLKTDPRFAG QPSRFLYSAIHIVDYLKSWLTIQKRLQQLDGD 108  
 428311644 LKVSNIKAEVEGLCDNLRTESRQDM PGRFANAKLVKDYKSAQEERRFRWRK 108  
 1085030414 RQKGLPSTFISQLSQSFKSDPRFLG QPSRFLYSAFNAVEYLFKSWLALNKRLQQLDRK 108  
 1300485477 SLTGKLPRLVSEACNQLKQDPQFSG QPGRFYSSAISTVHREFLSWLALQTRLRNQISGD 108  
 428312908 RQKRKIPAGIEKQLEPRTDSTRFIG QPGRFYASASALVDYLYKWLKQORLQKLEGD 108  
 1016001624 RTKKRLPKDFLARQIAELKNYPFEE QPSRFLYSVNVKVIDYLFKSWFEVQKALDWKLG 108  
 1507700957 KRKGIPTGTIVKELCDSLKNQELFAG QPGRFYSSVIVSLAEYLYKSWLKVORRLIFR 108  
 428306136 RKGKLPDGIKQLVQPLKTDPRFTN QPGRFYSAITLV DYLKSWLKVORLQKLEGD 108  
 1019531886 RQGRILTAKVIEQLGNELKKDPRFLG QPARFYTSGISLV EYLFKSWLKVORLQKRLDGD 108

1002781834 NRWL-VMLKSDDEELVQISDSSLETIQAKAEDIITLTKPE-K---PDKFPETSTTKGKSK 163  
 257060041 NRWL-AMKSDDEELIQISDQTNLEIQAKAEDIITLQPDQDR--EQSKKKAKKCKKSTNK 165  
 1405885249 QRWL-KMLKSDPELEQESDSSLEVIRTKAELFSKFTPQSDSEALRRNQNDKSKKGGKTK 167  
 440680311 QRWL-KMLKSDQELEQESDSSLEVIRNKAELFSKFTPQSDSEALRRNQNDKQKVKKTK 167  
 1111222001 IHWL-EMLKSDDEELVEISGVNLEALRSKAAEILAQFSPQID---TNNSQNKRKTKSKNSK 164  
 1016058386 ERWL-IILKSDLQLEQESDQSNVIRTEAETIAKFTPQSD-----QNKNQRKSKRTR 160  
 1002781021 RRWL-TVLKSDDEELIQSSQNLAEIRHKASEILDTHTQKTEK-----148



1002400088 RRWL-NLLKSDQELQNCQGSLEITIIQKAEIILKLMDSSEK---QSSSKPKPKPKPKPKK 164  
 1002400093 KRFL-TILKSDKQLIQDSQTDFTLTCYKAOQLLKRRTQNKLK-----LDEPQHSEKAHW 161  
 1000428792 LRWI-EMFNSDVELVEISGFSLEAIRTKASEILAITTPESD----PKTLLTKRGKTKQSK 172  
 1004799941 EHWL-KMLKSDVELEQESKCTLDATRSQATKILPKYLAQSE----QNNNQTSQSNKKKSK 163  
 1004798910 MRWW-EMLKSDAELVEVSGVTLSEIRTKAAEILSQFAPQPD---TVEAQPAGKGRKTK 164  
 1002125473 MRWL-EMLNSDVELVETS GSSMGAIRTKASEILAKAMPTSD----SDSSQPKTKKGKEAK 163  
 1007062327 KQWL-DMLRSDTELEQESNSNLEKIRAKATEILDSFATRQINQVNSKSKTKNNKKNQEK 167  
 1007109870 LRWL-EMFNSDAELVEHSGVSLDTRATSAEILAQFAPQDT---NRDTSNKGKSKMGK 163  
 428305730 RHEF-TILKSDDELQRESOCTFDTLCQEAAILLQQTQLQIEQKRLDANQPPPTLDKQAFW 173  
 1030021203 EYFLNNILKSDVELVQESNCDLQTRCKAODILSQPKEFLEQITNHDAVLNQTKSARKKV 179  
 17230183 EYFLNNILKSDIELVEESNCDLQILRAKAOEILSNPQDILRQITIDNPKDKPTKSIQKRV 173  
 1206817639 QRWL-GMLKSDVELQEESNCSLEKIRAKCTEILAEFVSKFTKDTTKSKTKIKSTKKS NK 167  
 1300380544 ERWL-KMLKSDVELERESNCSLDIIRAKAGEILAKVTEGCA---PSNQTSSKRKKKTK 163  
 220908491 QRWL-HVVEVSDSELHRSSESETKYRADILYQLNVEQQTQKTSVTDISTITPEETPS 165  
 1085045623 NRWL-EVLQSDDELMEVSGLDLSALQAEASQLLNILGSKNKTSKNRSKAKGKPKGKSAK 167  
 1085056708 IRWL-EMLNSDAELIEISGCSLEAIRTKAAEILAIAATPDSD---VAAPLTKTGKAKKSK 163  
 1406824382 TRWL-EMLNSDAELVELSGDTLEAIRVKAAEILAIAAMPASE---SDSASPKGKKGKKEK 163  
 428311644 QRWF-SLLRSDLELEQESGLSLEKLRTEATKILLKAQLECSREAEPDQATTDNSA-----163  
 1085030414 RRWL-EILSDDELAA DNSCLDARSKAAIILSQAIQAPS---LDSSPPRGKKGKSK 163  
 1300485477 TRWL-AMLSDDELTAIADTDINTLRLKASLLHLNEPIS---ESDQPEVKKTRSKKKN 164  
 428312908 MRWL-GMLKSDDELVNQSGCTLEVIRTKAAILYPLTSKNE-----SPQPTQTKGKSK 161  
 1016001624 LRWV-EMLLPDTELIKHFDNSLESLSQQQATLILDSIDSTVS-----148  
 1507700957 QRWL-QMLKSDDELVAESGRSLKEIEAKAESALDRLNREENPS-----150  
 428306136 IRWL-GMLKSDDELAAESNTSIEVIRTNAAEHTSLSSDGD-----149  
 1019531886 RRWL-EVLKSDDELKDSQTDLETIRQKATEILQSYEGTER-----148

1002781834 KY-----KNNNS-----LFTQLYNLYEKADDTLTHCAIRYLLKNGC 199  
 257060041 NS-----LFSQLDKLMEINNNITCIRYLLKNGG 196  
 1405885249 KP-----TKAKTSS-----LFKILLNTYEEAEDPLTRCALAYLLKNNC 205  
 440680311 KS-----TKPKTSS-----LFKIFLSTGEAEEPITCALAYLLKNNC 205  
 1111222001 KS-----KSSDISKN-----LSQQLFDTYRDTEDIVTHCAISYLLKNGS 203  
 1016058386 KS-----AKLQ-TPS-----LQNLNNTYEQTQETLTRCAIAYLLKNNC 198  
 1002781021 -----LFNHLEQLYQEEKNPFTHIALCYLLKNRC 177  
 1002400088 KS-----SSEETIT-----LFDRLFKAYNQGNDLSYALAYLLKNG 202  
 1002400093 S-----IINALYPAYNNAKTPISRAAFALLIKNG 191  
 1000428792 KS-----SASNPDRS-----LSRKLFDAYQETDDILSRSAISYLLKNGC 211  
 1004799941 KS-----KTKNENST-----LFDILEKAYDKAKNPLNRCFLAYLLKNNC 202  
 1004798910 KSDGDCAERTLRERS-----ISDYLFAYRDTEELTRCAINYLLKNGC 208  
 1002125473 KS-----SSSDRS-----LSNKLFEAYQETEDILSRSAISYLLKNGC 202  
 1007062327 EV-----KSLSI-----QSNILEFETYRQTEDNLTCAIVYLLKNNC 203  
 1007109870 KS-----QKSDSEGN-----LSKKLFDAYSSAEDNLTCAISHLLKNGC 202  
 428305730 E-----VAHVLYKADQADTPVSVIALLKNQN 203  
 1030021203 QNSSNEINASKQREN--SDYQENVDKNIPETLTELKIHKITQDILTQCAVAYLIKHN 237  
 17230183 RKNINASNSDTAKNNILNSQEKTTENISKSVIEILYEIHKTQDTIIRCAVTYLIKNYT 233  
 1206817639 KT---KKDTEESNST-----LFAQLCDIYDKTETLSKCAIYLLKNNC 208  
 1300380544 KS-----QATKDLPT-----LFEILLKAYEQAEESLTRALAYLLKND 202  
 220908491 SK-----NES-----LFPSSLRAQSEDDISCAIALIKNGG 199  
 1085045623 DPT-----LYQALWELYRETEDIKAKCVIAYLLKHKC 199  
 1085056708 KS-----SASNPDRS-----LSHKLFDAYQETDDILSRSAISYLLRNGC 202  
 1406824382 KP-----SSSPKRS-----LSKTLFDAYQETEDIKRSASISYLLKNGC 202  
 428311644 -----LWDNLATAQKFKSPRLKCVAILLKNIC 192  
 1085030414 GR-----SSSPVSS-----LFANLEKAYQETDDIKRCASISYLLKNNC 202  
 1300485477 QT-----SNQAGAN-----VSRTLFKLYDETEDPLTRCAIAYLLKNGC 202  
 428312908 KP-----QDLGSNRS-----LSKTLFQVQDIEDLITNICALKNC 200  
 1016001624 -----HDR-----LSTILFEKCGKTKKPEIKSAIYLLKNGC 180  
 1507700957 -----ISNRLEDLYDETEDLIRSAIVYLLKNGC 179  
 428306136 -----VSTRLWKTQETDDITKCVAILLKNIS 178  
 1019531886 -----LFSLEQAYRDEQNILTQTALNYLLKNRC 177

1002781834 KLPQK-PEDEPKFAQRRRKVEIKERIEIQE-SSIPQGRDLTGDSWLETIINNTATV 257  
 257060041 KLPQR-PEDETEKFAQRRRKVEIKERIEIQE-SSIPQGRDLTGDSWLETIINNTATV 254  
 1405885249 QSEL-DENPEEFTRNKRKEIEIERLKDQLQ-GRIPQGRDLTGEQWLETIIVKVPQ 263  
 440680311 QSEL-DENPEEFTRNKRKEIEIERLKDQLQ-GRIPQGRDLTGEQWLETIIVKVPQ 263  
 1111222001 KLPNK-EESPEKFTQRRRKVEIQERLREQE-ARIPQGRDLTDLNWLNTIINQVPQ 261

1016058386 QI SER-DEDP EEFNRNRKRKEIEIERLKDQLQ-SRIPKGRDLTGEEWLTLEIATTNPVQ 256  
 1002781021 KIPQK-PEDPEKFTKRRRKEVIAIDRLQEQLE-GRLPQGRDLTNHNWETLSIACQTDPE 235  
 1002400088 QIPED-DEDLDFALRKRKKEIEIERLQQQLE-NRIPKGRDLTGELWQEMLTIVNESIQ 260  
 1002400093 QVPDT-PENPDYQQRRKRKEIQIRRLLEEQLK-ASLPKGRITDSKHWENTLKLADTPI-T 248  
 1000428792 KLNDK-EENPEKFAKRRRKEVEIQIQRLLTDKLT-SRIPKGRDLTYSKWLETLFTATTTVPE 269  
 1004799941 QV SQK-DEDPNQYALRRSKKEKEIERLKKQLQ-SRKPNGRDLTGREWQQLIMATSSVPE 260  
 1004798910 KISNK-EENAEKFAKRRRKEIQIQRLLREKLE-ARIPKGRDLTDAKWLETLLLATLNVPE 266  
 1002125473 KLSDK-EEDSEKFAKRRRQVEIQIQRLLTEKLI-SRMPKGRDLTNRKWLETLFTATTTFPE 260  
 1007062327 EVNDV-EEDIEEYKNRKRKEIQIKRLEDQLK-SRVPKGRDLTGEKVVVEKAVNSVPE 261  
 1007109870 KVS NK-EENSEKFTQRRRKEIQIQRLLTEKLA-ARIPKGRDLTDTQWLETLFTATYINVPE 260  
 428305730 QVPEQ-FEDPKKQQRRQAKQEEIERLHQQLQ-SKAPKGRDLTDQQELRIKQPI-T 260  
 1030021203 QVSDL-EEDIKLLKRRTEKQVQIKRLEEQLQKNKLPNGRDLTGERYNHAFDNLINQVPQ 296  
 17230183 KISDT-EEDLNKLKERRAEKEIEIKRLEKQIQDSRLPNGRDLTGARYLEAFDKLINQVPK 292  
 1206817639 QVIDT-EENPDTFLKRRRAKEIEIKRLLQDQIV-GRIPKGRDLTDKWLDTIKLASSQVPQ 266  
 1300380544 EVSEV-DEDSKFKKRRRKEIEIERLLEQNLK-SRIPKGRDLTGDKWLTLEEAATRNVP 260  
 220908491 KIPET-EEDQEKFTQVNSKREEIQLEIEIS-ARIPKGRDLTSEELETLEIQQQSE 257  
 1085045623 QVPDK-PEDPKFRHRRREAEIIRAERLNEQLIKTRLPKGRDLTNEQWLVLEIATRQVPK 258  
 1085056708 KLNDK-EEDLEKFAKRRRKEVEIQIQRLLTDKLT-SRIPKGRDLTNAKWLETLFTATTTVPE 260  
 1406824382 KLTDK-EEDSEKFAKRRRQVEIQIQRLLTEKLI-SRMPKGRDLTNAKWLETLLTATTTVAE 260  
 428311644 QV NKV-EEDPEAQRRRKRKQIQIQRLLKEQLK-SRIPKGRNISEQELAAIQGLI-I 249  
 1085030414 QLSDR-EEDPEKFAKRRRKEVEIQIQRLLTEKLN-SRMPNGRDLTNTRWLETLEIATTSVPE 260  
 1300485477 KLPDQ-NENPEKFKRRRKEIIRLERLMNTFQTTIRPRGRHLSWHSWLEALETATSHIPE 261  
 428312908 KIPDQ-EEDKEKFAKRRRKEIKISIEEQLA-SRIPKGRNLTBEKWLETLEIATSTVPE 258  
 1016001624 TIPKK-PETTEKQDLKRRKVEIKITKHRQIE-SRIPKGRDLEDKKWLDLITASTAPI 238  
 1507700957 KIRQK-PEDPKKFAARRRKEIIRVRLQEQELN-GKAPQGRDLTGEKWLTLEIATTSQVPQ 237  
 428306136 KVPKKPEE NLEKFAKRRRQVQIKRLLRQLE-SRIPKGRDLTGKNWLETLEIATTTAPA 237  
 1019531886 QLPKK-PEDAKKFAKRRRKEVEIKRLLQKQIN-GRLPQGRDLTNDNWLETLLNACDTPK 235

1002781834 EASEIKSWQDKLLSQSKSIPYPVAYETNEO L T W S I N E K G R L C V K F N -- G L G K H T ----- 309  
 257060041 EAEDVKSQDKLLSQSKSIPYPVAYETNEO L T W S I N E K G R L C V K F N -- G L G K H T ----- 306  
 1405885249 NENEAKAWQAALLRKTANVFPVAYESNEO M T W L K N D K N R L F V R F N -- G L G K L N ----- 315  
 440680311 NENEAKAWQAALLRKTANVFPVAYESNEO M T W L K D K N R L F V R F N -- G L G K L T ----- 315  
 1111222001 SETEAKSWQNLLRKS H A V P F P V S Y E T N E O M T W F K N R K G R I C V K F N -- G L S E H T ----- 313  
 1016058386 NENEAKAWQAALLRKPADVFPVAYESNEO M T W L Q N D K G R L F V R F N -- G L G K L T ----- 308  
 1002781021 DTAQARSWQDKLLIQSQSIPFPINYE T N E O L T W H K N E K G R I C V K F N -- G I S D L S ----- 287  
 1002400088 DENEASAWQAKLLKSHNIPYPVAYETNTD L K W S K D S R G H L L V F F N -- G L V E S L K K L N L N 318  
 1002400093 TIEEITSLQTLQLQKYSHLFPFVFGYGTNTD L T W F K N P Q G R I C V K F N -- G L N Q Y P ----- 300  
 1000428792 NNAEAKRWQDILLTRSSSIPFPVVFETNEO L V W S T N E K G R L C V H F N -- G L S D L I ----- 321  
 1004799941 SNDEAKIWQKRLKDISLPFPIRFETNEO L M T W S K N E E G R I C V S F S G E L N D H I ----- 314  
 1004798910 NAEAKSWQDILLKKSITVFPVAYETNEO M T W F K N E R G R I C V K F S -- G L S E H T ----- 318  
 1002125473 DNAEAKRWQDILLTRPSSLPFPLVFETNEO M V W S K N Q K G R L C V H F N -- G L S D L S ----- 312  
 1007062327 SENEAKSWQASLLRKSSQIPFPVYETNEO L K W S I N E K G R I F V S F N -- G L G K L K ----- 313  
 1007109870 DETEAKLWQNSLLRKFSLLFPVAYETNEO L V W S K N R F G R I C L T F P -- T L R E H I ----- 312  
 428305730 EVAEFRDIDAQQLLRKFFALVYPVETSTN D L Q V E T D Q G R I C V D F -- G M S K Y T ----- 312  
 1030021203 NNEEFAEWIASLLNKVSDLPYPIDY- L Y S O L T W Y K N E Q R K I C V Y F N -- G V A K F H ----- 347  
 17230183 NNEEFANWIADASRKISNLPYIDY- L Y S O L T W Y K N Q D G K I F V Y F N -- G V S K Y H ----- 343  
 1206817639 DENEAKSWQNLKTSSSVPYSVDYETNTD I K W K H N N G S I F V N F N -- G L G E H Q ----- 318  
 1300380544 NEDEAKAWQAQLLREASSVFPVAYETSEO M T W F T N E Q G R I F V Y F N -- G S A K H K ----- 312  
 220908491 TVAQAREVNDKILLQPKFIPYPIIYGSSTOVRNRKTSKSRITVSI--SIDKYLKAADPE 315  
 1085045623 DEDEAAIWQSRLLTDAKFPPVAYETNEO L K W F L N G K G R L C V S F N -- G L S E H T ----- 310  
 1085056708 DNVEAKRWQDILLTRSSSVPFPLIFETNEO L V W S K N E K G R L C V H F N -- G L S D L T ----- 312  
 1406824382 DNAQAKRWQDILLTRSSSVPFPLVFETNEO M V W S K N Q K G R L C V H F N -- G L S D L I ----- 312  
 428311644 DDEHLRQVQASLTKQSPVPSISYEISTDLRVSNEQGRICVSI--GKGISKHT----- 303  
 1085030414 DEAQARQWQDVLLTKPKSLPFPLIFETNEO L F W S K N Q D R L C V H F P -- G L R D L A ----- 312  
 1300485477 NEEEAAGWQARLLTKPAILLFPVNYETNEO L R W S L N S Q G R I C V S F N -- G L S E H F ----- 313  
 428312908 NESQARSQDRLLTKPQSVPFPVYETNEO L T W S K N S K G R I C V C F -- G L S E H T ----- 310  
 1016001624 DQTEANTWFSILKQNQSSIPYPILYETNEO L K W S L N E K N R L S I R F S -- G L G E H S ----- 290  
 1507700957 DEAQAKSWQDILLTKSKLVYPYIVYETNEO L T W S K N E R G R I C V K F N -- G L S D H T ----- 289  
 428306136 DEPEAQSQDTLLTESKLVFPVAYETNEO L T W S K N E K G R I C V D I S -- G L S K H I ----- 289  
 1019531886 DVEQSRTWQDKLLKKSQSIPFPINYE T N E O L T W S K N E K G R F C V Q F N -- G I S D L K ----- 287

1002781834 -----FDIYCDQRQLKWFDRFYEDQQIKKDG-----KDHHSA--SLRSRVR 352  
 257060041 -----FDIYCDQRQLKWFDRFYEDQQIKKDG-----KDHHSA--SLRSRVR 349  
 1405885249 -----FDIYCDKRLHYFDRFLEDQEILRSS-----KRQHSSTLRSRRA 358

440680311 -----FEIYCDKRHLHMFDRFLEDDQEILKNS-----KRQHSSFTLRSRRA 358  
 1111222001 -----FEIYCDNRQLHWFKRFLSDQQIKKNS-----KNQHSSTFTLRSGRIS 356  
 1016058386 -----FEIYCDKRHLHWFKRFLSDQEELKNS-----KNQHSSTFTLRSGRIA 351  
 1002781021 -----FEIYCDQRQLKWFQRFYEDDQAKKGS-----KNQHSSTFTLRSGRIL 330  
 1002400088 PE-----FEIRCDRRHLHWFQRFCKDQEI-KAN-----NDQHSSTFTLRSARLI 362  
 1002400093 -----FQIACNKRQYPWFQRFQFTDYQSYKSH-----KQQVPTGLMVLRSARLL 343  
 1000428792 -----FEVYCDNRQLHWFKRFLSDQQTKRKS-----KNQHSSTFTLRSBRLA 364  
 1004799941 -----FEIYCGNRQLHWFQRFLEDQNIKNDN-----NDQHSSTFTLRSALIA 357  
 1004798910 -----FQVYCDNRQLHWFQRFLEDQNIKNS-----KNQHSSTFTLRSGRIA 361  
 1002125473 -----FEVYCDNRQLHWFQRFLEDQQTKRQS-----KSQYSSTFTLRSNGHLV 355  
 1007062327 -----FEIFCDKRHLHWFQRFLEDQDIKRQG-----KNQHSSTFTLRSGRIS 356  
 1007109870 -----FQIYCDNRQLHWFQRFLEDQEIKNNS-----KNQHSSTFTLRSGRIA 355  
 428305730 -----FEIACDRQLNFKRFLADQQLYKQH-----KTQIPTGLMPLRCRVA 355  
 1030021203 -----FQICCNKRQLHWFKRFLSDYKALKESEKGE--EIKLSSGLVTLRSVQLL 393  
 17230183 -----FQICCNKRQRHFFERFLEDHAKWKESEKGE--EVKLSGLVTLRRCVQL 389  
 1206817639 -----FEVYCDNRQLHWFQRFLEDQMIWHD-----BEKYSSTFTLRSARLV 361  
 1300380544 -----FQVYCDNRQLHWFQRFVEDFQIKKNGDKKSEKEYPAGLTLTLCSTRLR 360  
 220908491 IKAWFKDHQEPFRHLHDFRQLPFFRFLSDVQFYQAN-----KETYPAGLTLTLCSTRLR 370  
 1085045623 -----FEVYCGQRQLHWFNRFLSDQQIKKEN-----QGERSTAGLTLRSRGRLV 353  
 1085056708 -----FEVYCDNRQLHWFKRFLSDQQTKRKS-----KNQHSSTFTLRSBRLA 355  
 1406824382 -----FEVYCGNRQLHWFQRFLEDQQTKRKS-----KNQHSSTFTLRSNGHLV 355  
 428311644 -----FEVYCDNRQLHWFQRFYEDDYKIFTQN-----KDQVPAGLTLRSARVA 346  
 1085030414 -----FQVYCDNRQLHWFNRFLSDQQTKSS-----KNQHSSTFTLRSAYLA 355  
 1300485477 -----FEVYCDQRDLHWFNRFLSDQETKKAS-----KNQHSSTFTLRSRQIA 356  
 428312908 -----FQIYCDQRQLKWFDRFLSDQQIKRES-----KDQHSSTFTLRSRQIA 353  
 1016001624 -----FQLCCDHRQLPYFQRFYEDQEELKKAS-----KDQLSSTFTLRSAMIL 333  
 1507700957 -----FQIYCDNRQLKIFNRFYEDDQIKKAS-----KNSHSSSTFTLRSATIA 332  
 428306136 -----FQIYCDQRQLKWFDRFYEDDQEIKNAN-----KDQYSSTFTLRSRGA 332  
 1019531886 -----FEIYCDQRQLKWFDRFYEDDQVKKDG-----KDQHSSTFTLRSRGLL 330

1002781834 WQE---GLG-----KGGK---PWNHRLTLHCS 373  
 257060041 WQE---GLG-----KGGK---PWNHRLTLHCS 370  
 1405885249 WLP---GEE-----KGE---HWKVNQLNFYCS 379  
 440680311 WLP---GEE-----KGE---HWKVNQLNFYCS 379  
 1111222001 WQE---EVG-----KDR---PWNVNHKLKLDCT 377  
 1016058386 WSL---GEE-----KGE---PWKVNKLHLYCT 372  
 1002781021 WQE---GNE-----KQV---PWNHRLTLHCS 351  
 1002400088 WRE---GQG-----KED---PWKIHQLYLDCT 383  
 1002400093 WQP---TNG-----QGE---PWNTHHLTLHCA 364  
 1000428792 WQQ---GEG-----KGE---PWNHGLALYCC 385  
 1004799941 WQE---NKQ-----HKENSLPWNTRRLLTYCT 381  
 1004798910 WQE---GEG-----KSE---PWKVNRLILYCS 382  
 1002125473 WQE---GEG-----KSE---PWNLNRLNLYCC 376  
 1007062327 WLE---QPG-----KGGK---PWNINRLLFLCS 377  
 1007109870 WQE---GEG-----KGE---PWNHHLTLHCS 376  
 428305730 WFE---GQDDFALIVATWLLIAVIQHKFYHIAWLLLNHRIL CSP---PWNHRLTLHCS 409  
 1030021203 WQQ---GEG-----ASE---PWKVNKLALHCT 414  
 17230183 WQQ---GEG-----KGE---PWKVNKLHLYCT 410  
 1206817639 WLE---KKG-----RGGK---PWNVNYLYLHCS 382  
 1300380544 WKE---SAE-----KGD---PWNVHRLTLHCS 381  
 220908491 WRE---GEG-----KGD---PWNINLTLHCS 391  
 1085045623 WKPYSDDAS-----RSD---PWMANQLTLHCS 377  
 1085056708 WQE---GEG-----KGE---PWNINRLLTYCT 376  
 1406824382 WLE---GEG-----KGE---PWNHHLTLHCS 376  
 428311644 WQE---GEG-----EPE---PWNHRLTLHCS 367  
 1085030414 WQQ---GKE-----KGE---PWNTHYLLTYCT 376  
 1300485477 WQE---GKG-----DAE---HWVHRLVLSCS 377  
 428312908 WAL---GKG-----KGD---AWHRLTLHCS 374  
 1016001624 WKE---DEG-----KGE---LWDRHKLTYLHCT 354  
 1507700957 WQE---GKG-----KGE---PWNVNRLLTYCT 353  
 428306136 WQE---GTD-----KGE---PWNHRLTLHCS 353  
 1019531886 WQE---GKG-----KGE---LWDRHRLTLHCT 351

1002781834 LDTRFWTEGTTQQVQEKSKKFQTNRLRMKPELTFSIFFRSQTLETYLQVWLVI TAYRLQ 433

257060041 LDTRFWTTEEGTQQVQVEKSKKFQTNRLRMKPELTF SIFFRSQTLLETYLQVWLVI TAYRLQ 430  
 1405885249 LDTRMLTTEGTQQVVEEKVTAITEILTKTK----- 409  
 440680311 LDTRMLTTEGTQQVVEEKVTAITEILNKT----- 409  
 1111222001 VDTRIWTAEGTNQVREKAE EIAKTI TSK----- 407  
 1016058386 LDTRMWTTEGTQQVSEKTTKITETLNQAK----- 402  
 1002781021 LDTRIWTEEGTEEVKQEKAE EIAKVL TSMN----- 381  
 1002400088 VETQIWTTEAGTKQVQSEK MVEFQLNQLRMKPELTFPIFFRSQSLPTYFNLWKVITSYRIL 443  
 1002400093 IDNDIWTISGIIQQVQKQKILQTEQKI ANFH----- 394  
 1000428792 VDNRIWTAEGTEQVRQEKAE EITKFI TKMK----- 415  
 1004799941 LDTRLWTTDGTTEKVKQEKVDEFTQQLANME----- 411  
 1004798910 VDTRIWTAEGTNLVREKAE EIAKAI AQTK----- 412  
 1002125473 VDNRIWTAEGTEQVRQEKAE EISKLI TKMK----- 406  
 1007062327 IDTRMLTTEGTQQVIEEKIADTQNKI AKAQ----- 407  
 1007109870 VDTRIWTEEGTNLVKEEKAE EIAKTI TQTK----- 406  
 428305730 VDHRIWTEEGKEIVKAEKIPQTEKLI NDFQ----- 439  
 1030021203 YDARILTAEGTEEVROEKTDTTQKQVTKAE----- 444  
 17230183 VDTRIWTAEGTEEARKEKINKIQRQVEQAE----- 440  
 1206817639 LDTSIWTAEGTEQTRINKINETDEAI AKAKTK----- 414  
 1300380544 IDTRIWTEEGTEQVRAEKIAQVEKTI SKRE----- 411  
 220908491 FDTRIMTAEGLTDVQEKSEKALKNLAKAK----- 421  
 1085045623 VDTRIWTAEGTEQVRQEKATSIAKVI AGTK----- 407  
 1085056708 VDNRIWSAEGTEQVRQEK EEEITKFI TKMN----- 406  
 1406824382 VDNRIWTEEGTEIVROEKADEITKFI TNMK----- 406  
 428311644 VDTRIWTAEGTEEVRAEKIAQTQAAI DRQK----- 397  
 1085030414 VDTRIWTAEGTEIVROEKTAIEKVI NRTK----- 406  
 1300485477 IETDTWTQEGTEETIROKASDCAKVI ASTK----- 407  
 428312908 LDTRIWTEEGTEQVRQEKADDI AKTL ARMK----- 404  
 1016001624 FETRCLTAEGSTIVEEKKQKEVTKII DLMK----- 384  
 1507700957 FDNLILTEGTEVVROEKAEAI ANTL TKIK----- 383  
 428306136 VDTRIWTAEGTEQVCEKAE DIAKTL TRMK----- 383  
 1019531886 LETRCWTEHEGTEQVKQEKADEIAGIL TRMN----- 381

1002781834 SFLDK-----GNVAKAHQEFQKAIKRNESSLQ-KIT--S--SYN-RPHKTL YQGKSHIEV 482  
 257060041 SFLDK-----GNVAKAHQEFQKAIKRNESSLQ-KIT--S--SYN-RPHKTL YQGKSHIEV 479  
 1405885249 ---QK-----DDINDKQQAF---ITRQQSTLS-RIN--N--PFP-RPSKPNYQ GKSSILV 452  
 440680311 ---QK-----DDINDKQQAF---ITRQQSTLA-RIN--N--PFP-RPSKPNYQ GKSSILV 452  
 1111222001 ---EK-----GELNDRQLAH---IKRKQSTLD-RIN--N--PYP-RPNKPLYKGLSNILV 450  
 1016058386 ---RK-----DVINDKQQAF---VTRQQSTLD-RIN--N--PFP-RPSKPNYQ GQPSILV 445  
 1002781021 ---EK-----GDI TKNQQAF---IKRKQSTLD-KLE--N--PFP-RPSQPLYRGQSNILV 424  
 1002400088 KFLEK-----GDFTKACKNFQDAIKRTE SCLE-NLQ--S--SYL-TSQKSL YQGNPEIIM 492  
 1002400093 ---SKA---LEKELTPNQQR---LKASQTS LN-LLKTFDINEFF-PSKCSLYQ GSPDIL 444  
 1000428792 ---DK-----SDISETQLAF---IKRKESTLT-RIN--N--SFD-RPSKPLYQ GQSHILV 458  
 1004799941 ---QK-----ENINQNQQNY---VKRLQSTLN-KLN--N--AYP-RHNHDLYQ GKPSILV 454  
 1004798910 ---AK-----GKINDKQQA H---IKRKNSSLA-RIN--N--LFP-RPSKPLYK GQSHILV 455  
 1002125473 ---EK-----SDIKDTCKAF---IQRKESTLN-RMN--N--SFE-RPSQPLYQ GQSHILV 449  
 1007062327 ---EK---CEGELNPNQQA H---INRKKSTLA-RIN--T--PFP-RPSKPLYQ GKSHIVV 452  
 1007109870 ---AK-----GDINDKQQA H---LKRKNSSLA-RIN--N--PFP-RPSQPLYK GQSHILL 449  
 428305730 ---QKERIQENGLTTGQQQR---LKASETS LR-LLQ--NCDHF A-ASKRISYRGP NRIL 489  
 1030021203 ---GN-----ENIDSDEQKN---LNRNISSLS-RLN--N--SFA-RPSKPIYRGQSNILV 487  
 17230183 ---ET-----ENLDEQQQKQ---LKKNKSSLS-RLN--N--SFN-RPIQPIYQ GLSNMIV 483  
 1206817639 ---DK-----QELTENCLAY---LQRQQSTRN-KLN--N--SFPGRPSKPIYKGN SHILV 458  
 1300380544 ---QE-----VNL SKTCLER---LQAKHSERE-RLN--N--IFPNRPSKPSYR GKSHIAI 455  
 220908491 ---PD-----PRNHSTLD-RLK--N--LPVRPSRTPYQGNPEIILV 453  
 1085045623 ---AK-----GNINQKQDF---ITKREKTELE-LLH--N--PFP-RPSKPLYQ GKPSITA 450  
 1085056708 ---EK-----SDISETQQAF---IKRKESTLT-RIN--N--SFE-RPSQFLYQ GQSHILV 449  
 1406824382 ---KK-----SDISDTQQAL---IQRKESTLT-RIN--N--SFE-RPSQPLYQ GQSHILV 449  
 428311644 ---AK-----GTQ-----SKKLNTSLE-RLK--TFQGF S-RPSRAS YKGNCSIVI 435  
 1085030414 ---AK-----NDITETQQA F---IQRQKSTLA-RIK--G--HFD-RPSQSIYQ GQSHILV 449  
 1300485477 ---AK-----ENRSQNDAF---IRRERMLE-LLE--N--QFP-RPSYPLYQ GQPSILA 450  
 428312908 ---EK-----GDINDKQQA F---IKRKNSTLA-RLN--N--PFP-RPSQPLYQ GRSHIAV 447  
 1016001624 ---AK-----EELSDSQQA F---IRRKNSTLA-KLN--N--TFP-RPSKPVYQ GKPNVHL 427  
 1507700957 ---EK-----GDINQKQQA F---IRRKETSLS-RIN--N--PFP-RPSRPLYK GKSNILL 426  
 428306136 ---KK-----GDINDRQQA F---IRRQQSTLA-RLN--N--PYP-RPSQPLYQ GQPHILV 426  
 1019531886 ---EK-----GDI TKNCKAF---VRRKQSTLN-RLE--K--PFP-RPSQPLYQ GKSNILV 424

1002781834 GVAMGLEKPAIVAVVDGTTGKALAYRSLKQLGN----- 516  
 257060041 GVAMGLEKPAIVAVVDGTTGKALAYRSLKQLGN----- 513  
 1405885249 GVSFGLEKPVIVAVVDVVKNOVLAYRSVKQLGE----- 486  
 440680311 GVSFGLEKPVIVAVVDVVKNKVLAYRSVKQLGE----- 486  
 1111222001 GVSFGLEKTAIVAILDASTDKVITYRSIKQLGE----- 484  
 1016058386 GVSFGLEKPVIVAVVDVIKNEVLAYRTVKQLGK----- 479  
 1002781021 GVSFGLGVDPKPAIVAVVDGITQKTLTIEYIKQLGN----- 458  
 1002400088 GVAMGLSQPAIIAVVNVVTQEVLTYSRLKQLGK----- 526  
 1002400093 GVSFGLLENPAIIAIIINISTQEILTYSRTTKQLSRTKVRNKKPN--SNNSNQSLSSAYKQ 502  
 1000428792 GVSFGLLEKPAIIAVVDIAIGKVLTYRSLRQLGD----- 492  
 1004799941 GVSFGLLEKPAIIAVVDSSTNIVLAYSRIKQLGD----- 488  
 1004798910 GVSFGLLEKPTIIVAVVDGSGIKVLTYSRIKQLGD----- 489  
 1002125473 GVSFGLLEKPAIVAVVDIAIGKVLAYSRIKQLGD----- 483  
 1007062327 GVSFGLKATAIIAVFDAMNNQVLAYRSTKQLGD----- 486  
 1007109870 GVSFGLLEKPAIVAVVDGTTGKVLTYRNIKQLGD----- 483  
 428305730 GVSFGLHEPVIIIVNTTTGKTLASLNTKQLDKRRVRDQQPELPHYEERQHFNTIYKE 549  
 1030021203 GVSFHPVELATLVVVDITTEKELICTIVKQLGD----- 521  
 17230183 GVSFHPVELATVAVVDITTTQKVLAYKTTINELLDN----- 517  
 1206817639 GVSFGLLEKPVIVAVVDVSNKVLAYSVKQLGQ----- 492  
 1300380544 GVSFGLLENPAIVAVVDVATKKVLTYSRFKQLGD----- 489  
 220908491 GLRVGLTNPIITAAVVNGRTGSEVLTYSRTPSTLLGD----- 487  
 1085045623 AVSFGLEKPAIIAVVDIVTDKALTYRSIKQLGQ----- 484  
 1085056708 GVSFGLLEKPAIVAVVDIAIGKVLAYSRIKQLGD----- 483  
 1406824382 GVSFGLLEKPAIVAVVDIAANKVLAYSRIKQLGD----- 483  
 428311644 GVSFGRAKPAIVAVVNVETGEVLAYRQVKQLNK-----PIKEGKTKKK 479  
 1085030414 GVSFGLDKPAIVAVVDIAAEKVLAYRNTKQLGD----- 483  
 1300485477 GVSFGLDKPAIIAVVIQITGKALTYRSIQILGQ----- 484  
 428312908 GVSFGLLEKPAIIAVVDIETGKALAYSRIQLLGD----- 481  
 1016001624 GIAMGLEQPVIIAVVDIETDKVITYRNTKOLLRE----- 461  
 1507700957 GVAIRLDKPAIVAVVDGATDKALAYLSTKOLLGQ----- 460  
 428306136 GLAFELDKPAIIAVVDGTTGKALTYRSLKOLLGQ----- 460  
 1019531886 GVSMELEKPAIIAVVDGVTTRKVLTYRNIKOLLGQ----- 458

1002781834 --NYHLFNRQDKQKQNTSHDRHKSHKHFADNQFSESGLGQIDVLLAKAISTAATG 574  
 257060041 --NYHLFNRQDKQKQNTSHDRHKSHKHFADNQFSESGLGQIDVLLAKAISTAATG 571  
 1405885249 --NYNLNRQRQDDQRLSHERHKAQKQONAPNSFSESGLGQYVDRLADAIITAIKKYQAG 544  
 440680311 --NYNLNRQRQDDQRLSHERHKAQKQONAPNSFSESGLGQYVDRLADAIITAIKKYQAG 544  
 1111222001 --NYKLNQRQDDQKQKQNTSHDRHKSHKHFADNQFSESGLGQIDVLLAKEIVAIATQKYSAG 542  
 1016058386 --NYNLNRQRQDDQRLSHERHKAQKQONAPNSFSESGLGQYVDRLADAIITAIKTYQAG 537  
 1002781021 --NYPLIQRRQDDQKQKQNTSHDRHVAQRKEAFNQFSDSELGQYVDRLTKAIVTLAKKYKAG 516  
 1002400088 --NYNLNRQRQDDQKQKLSHQRHKAQKQKDFNQFSESGLGQYVDRLIAKAIIVQVAKEYQAD 584  
 1002400093 ISNYELFLOYQKQKHHNQHRHNAQINDANNYGEANLGLYLNRLLAKAILELAQQYQVBS 562  
 1000428792 --NYELLNQRQRQQRSLSHERHKAQKQFSPNQFSESGLGQYVDRLLAKEIVAIATQYKAG 550  
 1004799941 --NYKLLNRQRQQRQQRNSHERHKAQKQSNMPNKLSESGLGKYIDNLLAQAIITAKNYQAG 546  
 1004798910 --NYRLLNRQRQQRKHTLSHQRVQVQILASPNQLGSESGLGQYVDRLLAKEIVAITQTYKAG 547  
 1002125473 --NYELLNQRQRQQRSSSHERHKAQKQFSPNQFSESGLGQYVDRLLAKEIVAIATQYKAG 541  
 1007062327 --NYKLLNRQRQQRQKQRLSQRHKAQKQFASNSFSESGLGQYVDRLLAKEIVAVAKNFGAG 544  
 1007109870 --NYKLLNRQRQQRKHLLSHQRHIAQRITAAPNNEFSDSELGQYVDRLLAKEIVAIATQYQAG 541  
 428305730 ISDYELFLFYRQDKQKQHQHQRHKAQKATPDHSKANLGLLITNLLAKAIEFVQHQV 609  
 1030021203 --AFSLLSRRRRQVHFRKEREKAKKQKDSPCNMFSESGLGEYVDKLLAKRIVEVTKEYKAS 579  
 17230183 --AFHLLSRMRQIHFRRKRRKKAQKQKDSPCNLFSESGLGEYVDKLLAKRIVEVAKEYQAI 575  
 1206817639 --NYKLLNRQRQQRQKHLAQKRHESQKQAPNQFSESGLGLYVDRLLAKEIVAIATQYQAS 550  
 1300380544 --NYNLNRQRQQRQKQRLSHERHKAQKQKQAPNSFSDSELGQYVDRLLAKEIVAIATQYQAS 547  
 220908491 --RYDLFNRHRHQDEQNALEHRHKAQKRGVITYQPPSESGLGKYVDRLLAKEIVAIATG 545  
 1085045623 --NYKLLFTKHLRQKQCAHQRHQNOVESAEENRISSEGLGEHLDSLLAKAILETAAYEYAS 542  
 1085056708 --NYELLNQRQRQQRQYLSHERHKAQKQFSPNQFSESGLGQYVDRLLAKEIVAIATQTHKAG 541  
 1406824382 --NYELLNQRQRQQRQYLSHERHKAQKQFSPNQFSESGLGQHIDRLLAKEIVAIATQYKAG 541  
 428311644 KTOYELLRQREDDRLNSHQRHKAQKQKNGAPCNFSESGLGQYVDRLLAKEIVAIATQYKAS 539  
 1085030414 --NYKLLNRQRQRQQRSLSHKRHKAQKQKADTNQFSESGLGQYVDRLLAKEIVAIATQYKAG 541  
 1300485477 --NYKLLNRQRQRQQRNAHHRHNNQRKGGSQLRESNQGQYLDRLIAHEIVAIATQYQVBS 542  
 428312908 --NYKLNQRQQRQKQKQNTSHDRHKSHKHFADNQFSESGLGQYVDRLLAKEIVAIATG 539  
 1016001624 --DYRLLRRRRIEKQKLSHQNHKARKRFNFQKQKESNLGELYDRLIAKAITVAQYQVBS 519  
 1507700957 --NYHLLNRQRQQRQHILSHQRNVAQRHHANNKSESSELGQYVDRLLAKEIVAIATQYKAG 518

428306136 --NYPEL LNQRKRKQQQSHDRHKAQSNGRSNQFSDSOLGELYVRLAKALVTLAQSYYQAG 518  
 1019531886 --NYPEL LNQRQRQRQRSHDRNIQRKEAFNQFSDSOLGQHRLLAKAIIISIAQKYQAG 516

1002781834 SIVVPKLKDMDRELIQSEIQAKAEAKIPGYVEGOAKYAKSYRVQVHDSHRLIDNITSOA 634  
 257060041 SIVVPKLKDMDRELIQSEIQAKAEAKIPGYVEGOAKYAKSYRVQVHDSHRLIDNITSOA 631  
 1405885249 SIVLPLKLRDMREQISSEIQSRAENQC PGYKEGQOKYAKYRINVHRWSYRLIESIKSOA 604  
 440680311 SIVLPLKLRDMREQISSEIQSRAENQC PGYKEGQOKYAKYRINVHRWSYRLIESIKSOA 604  
 1111222001 SIVLPLKLRDMREQINSEIQAKALEKCPDCIEAOKKYAKOYRRSVNOWSYRLIENIKSOA 602  
 1016058386 SIVLPLKLRDMREQISSEIQSRAEKKCPGYKEVQOKYAKYRMSVHRWYGRRLIESIKSOA 597  
 1002781021 SIVLPLKLRDMREIVQTEIQTKAERI PNCEIAQKNYAKCYRVQVHDSYRLIDNIEAOA 576  
 1002400088 SIVAVPKIRQMREI IQSEVQARAERKI QGYKEGOKKYAQYRENVHDSYRLIESIQOAS 644  
 1002400093 LIILPLSLKNKRELIQSEIRAKAELKYPGCKEKQDSYAKDYRTNVHDSYQQLIKCEBKA 622  
 1000428792 SIVLPLKLGDI REIVQSEIQAI AEAKCPSSSEIQOKYAKOYRVNVHDSYRLIQSIQSKA 610  
 1004799941 SIVLPTMKNVRESIQSEIEARAVKRC PNKYKEGQOQYAKOYRSIHRWSYNRLMQFIQSOA 606  
 1004798910 SIVLPLKLGDMREIQVQSEIQAKAEQKSDLIEVQOKYKSKOYRVSVHDSYRLIASIRSSA 606  
 1002125473 NIVLPLKLGDMREIVQSEIQAI AEAKCPGSVEVQOKYAKOYRVNVHDSYRLIQSIQSKA 601  
 1007062327 SIVLPLKLGDMREI IQSEVQAKAEKKIPGFIELOKNYAKYRKSANWSYRLIENIQSOA 604  
 1007109870 SIVLPLNLDGDMREI IQSEIKAKAEQKSDLVEVQOKKYAKOYRPNVHDSYRLITNIDSOB 600  
 428305730 TILPLDLKNKRESIESEAKAKLKLKPKDKSRDQQTINILSEYQWSYKQLSDCNK 669  
 1030021203 CIVLPLRLKDTREIRTSVIQAKAEAKFPGDVNAOKIYVKEYNRQVHNSYRLQESIKSKA 639  
 17230183 CIVLPLKLDKMEIRTSVIQAKAETKFPGNVNAOKLYVKEYNRQVHNSYNRLQESIKSKA 635  
 1206817639 SIALPKLRDMREI IQSEIQAKAESKIPGYKEGQOKYAKYRMSVHRWSYRLIGNIQAOA 610  
 1300380544 SIVLPLKLRDMREI IHNEVQAKAEKKIPGYKEGQOKYAKOYRISVHDSYNRLSQILESOA 607  
 220908491 SIVLPLTHREI LAETAARAEKCPGSVYADNYAKYRCKHNSYNRLISA 605  
 1085045623 SIVLPELGNIREI IHAETQAKAERKI PGLKEKQDEYAAKFRASVHRWSYRLAQKVTTKA 602  
 1085056708 SIVLPLKLGDMREIVQSEIQAI AEAKFPGYVEGQOKYAKOYRVNVHDSHRLIQSIQSKA 601  
 1406824382 SIVLPLKLGDMREIVQSEIQAI AEAKFPGYVEGQOKYAKOYRVNVHDSYRLIQSIQSKA 601  
 428311644 SIVLPLDLNREI LAEAESEVRAAEKCPGNQKLDQSYAKOYRASVHDSYRLAQCLK 599  
 1085030414 SIVLPLKLGDMQEILTSEIQARA AEAKCPNYVEGQOKYAKOYRISVHNSYRLMQNIQSOA 601  
 1300485477 SIALPLDLGDI REIVQSEVQARA AEKILGSI EQQRKYAROYRASVHRWRYAQLTQFIQSOA 602  
 428312908 SIVLPLKLGDMRELVHSEIQTRAEQKI PYSYVEGQOKYAKOYRVNVHDSYRLIENIQVOA 599  
 1016001624 TILPLRLRDMRSITEAEIQLRAEKKIPEYKEGQOKKYADYRVQVHDSYRLIENVKLIC 579  
 1507700957 SIVVPMEDTREI IQAEVQARA AEAKIPGCI EKQKBYAKYRFINVHNSYRLIDLIKAOA 578  
 428306136 SIVLPLGDI REI IQSEIQAKAEQKPGYIAGQOKYAKOYRISVHNSYRLIDNITSOA 578  
 1019531886 SIVVPKLEDI REATQSEIQAKAEAKIPNCEIAQAEYAKYRMOVHNSYRLIDNITSOA 576

1002781834 SKFNITVEEGEQPHQGNPQDKAKLLAIAAYHSRLCA----- 670  
 257060041 SKFNITVEEGEQPHQGNPQDKAKLLAIAAYHSRLCA----- 667  
 1405885249 AQAGIAIETGTQPIRAS PQEKARDLALFAYQERQAALI----- 642  
 440680311 AQAGIAIETGKQPIRSGSPQEKARDLALFAYQERQAALI----- 642  
 1111222001 IKTGIVIEESKQPIRGSSQDKAKELATTAYKSRKKS----- 638  
 1016058386 AKAGIFTEIGTQPIRGSPQEKARDLALFAYQERQAALI----- 635  
 1002781021 SKLGIVLEISQOPYKGTPHDKAIALALNAYQSRLSA----- 612  
 1002400088 AKFGIRVEIASQSYQGSFQEQALALIAAYTNRLAVG----- 682  
 1002400093 AQIGIDTATGKQMNLETSQDQARNLVLNFCQKFSPTQV----- 660  
 1000428792 AQIGIVIEEGKQPIRGSPQDKAKELALYAYSLRLARRS----- 648  
 1004799941 VKANISIEQGQPIRGSSQEKARDLALIAAYYLRONKS----- 643  
 1004798910 AKVGIVIEESKQPIRGSPQEKARELALIAAYNSRRRT----- 642  
 1002125473 SQAGIVIEEGKQPVRRGSPHEQAKELALSAYHDLARRS----- 639  
 1007062327 TKEGIEIETGKQPTRGIPQEQARDLALFAYQCRIFA----- 639  
 1007109870 KKAGIVIEEGKQPIRASPLEKAKELALINAYQSRKA----- 635  
 428305730 SQSEIAEIEIQDISQBNPYQKARNLITTTKNSGNCSAKIE 711  
 1030021203 AEFKISIEFGMQPSYDNLQEQAINLALSAYQCRINTIGR---- 678  
 17230183 AELKISIEFGIQLSYDTLQAQARDLALSAYQCRINTIDR---- 674  
 1206817639 AQAGILIEISGQIRGSPQEQAKHLAISAYIEROTILNK---- 649  
 1300380544 TKAGISIERGSQVIQSSQEQARDLALFAYNERQLSLG----- 645  
 220908491 EQLSIEVESFDPYEGDSYQAKDLAIAVYHSRLALALK----- 643  
 1085045623 SLHGLETESTRQSLQGTPEKARNLALISAYESRKVAQRA---- 641  
 1085056708 AQIGIVIEEGKQPIRGSPQDKAKELALSAYNLRRLARRS----- 639  
 1406824382 AQTGIVIEEGKQPIRGSPHDKAKELALSAYNLRRLTRRS----- 639  
 428311644 GKAEIATEKVHDPHGDTPEKARDLALIAAYANRKKVSVS----- 637  
 1085030414 AQAEIVVEEGKQLIRGSPQEMAKELALIAAYQSRQPQ----- 637  
 1300485477 AQVGISIEITKQPLSGTPQEKARNLALIAAYQSRK----- 636  
 428312908 AKIGISIEEQQPVRRGSPQEKAKELALIAAYHSRLALNLP----- 635

```

1016001624 EKVGIIVVEAKQPKQGTLT EKALQLVLSATEKNLKKK----- 616
1507700957 AKAGITVIEESKQSIRGDPKKQAKEIAYCA YRDRIVVPF----- 615
428306136 AKISIVIEEQQPIRGSPQEKAKEAISA YDRTKTS----- 614
1019531886 SKLGIITIEEQQLPLQGTPLQKAELAFKAYRS RL SA----- 612
  
```

### HHpred output for sequence 1002781834

>COG0675 InsQ Transposase [Mobilome: prophages, transposons].

Probab=98.99 E-value=3.4e-09 Score=106.41 Aligned\_cols=142 Identities=20% Similarity=0.212 Sum\_probs=0.0

```

                                RuvC-I
Q ss_pred                      CCCCCCcCCCCcEEEEEcCCCCeEEEEcCccceEEEEccHHHHhccHHHHHHHHHHHHHHHHHHHHHHHHcCCC
Q Tue_Jul_12_23: 465  SYNRPKHTLYQKSHIIVGVAYELEKPKATVAVVDGTGKATAYRSLKQLLGNNYHLFNROGKQKQNTSHQRHKSKQH FAD 544 (670)
Q Consensus 465  ~f~RPskp~YqG~p~iivGVdlEL~PATvAVvD~t~Kvl~yrs~kQLLg~ny~Ll~R~R~qqq~lsh~Rhk~qk~ 544 (670)
                                                ++..|..+ .-.+...| | | | | +...| | | + .+.....|.....-+..|..+..+..|..+...
T Consensus 162  ~~~~~giDl~~~~~k~ls~~~~~ 235 (364)
T COG0675 162  LVEVEEEP~VPKPGKV VGI DLGLK NLATVS-----DNGTVPIPRDGRKLLKRLKKAQKRLSRKKSRSKRRKKAKLKLAR 235 (364)
T ss_pred EEEcccc-cCCCCcEEEEEcCCCCeEEEEc-----CccccCchHHHHHHHHHHHHHHHHHHHHHHHHHHHHHHHH
  
```

```

                                RuvC-II
Q ss_pred                      cchHHHHHHHHHHHHHHHHHHHHHHcCCCEEEcCCCcHHHHHHHHHHHHHHhCCChHHHHHHHHHHHHhCCCH
Q Tue_Jul_12_23: 545  NQFGESQLGQYIDCLLAKAITSVAQTYCAGSIVVVKKMDRELIQSEIQAKAEAKIPGYVEGQAKYAKSYRVQVHQWSHG 624 (670)
Q Consensus 545  ~q~Es~LG~yvdrllAk~IV~lAq~yqAgsIVLpkL~diRe~i~SeiqArAe~K~pg~ke~QkkYaK~yR~vH~WSYg 624 (670)
                                                .....+-.+... |.| + | | | + | | . + + + + + | | | + + + + + | | | + + + + + + + + + + | | | +
T Consensus 236  ~~~~~r~~~~~k~~~~v~~~~i~~~~~ 283 (364)
T COG0675 236  L RERIRNRRKDF~HKLAKKLVE LADLVGVE TLVVE D LVK-----RRSISDWAFG 283 (364)
T ss_pred HHHHHHHHHHHH~HHHHHHHHHHHHheeeeeeccccc-----ccchHHHHHHHHHHHHHHHHHHHHHH
  
```

```

Q ss_pred                      HHHHHHHHHHHcCceEEEE
Q Tue_Jul_12_23: 625  RLIDNITSQASKFNITVEEG 644 (670)
Q Consensus 625  RL~q~I~kA~k~GI~Ve~~ 644 (670)
                                                +|+..|+| | | +..| | | ++.
T Consensus 284  ~~~~~l~yka~v~~~ 303 (364)
T COG0675 284  ELRRQLEYKAEWGGIVVKV 303 (364)
T ss_pred HHHHHHHHHHHcCceEEEE
  
```

**Supplementary information S4 (figure). Strength of purifying selection for Class 2 effector protein families.**

The three quartiles of the distribution of the  $dN/dS$  ratio, estimated for sequence pairs with  $0.0002 < dN < 1.0$  and  $0.0002 < dS < 1.0$  (see supplementary information S1 (box) for details) are given. The background color highlights the scale from low (blue) to high (red) values.

| system | gene    | no. of sequence pairs | dN/dS        |        |              |
|--------|---------|-----------------------|--------------|--------|--------------|
|        |         |                       | 1st quartile | median | 3rd quartile |
| II-A   | cas9    | 2239                  | 0.12         | 0.19   | 0.25         |
| II-B   | cas9    | 67                    | 0.21         | 0.32   | 0.64         |
| II-C   | cas9    | 2756                  | 0.08         | 0.12   | 0.19         |
| V-A    | cas12a  | 48                    | 0.04         | 0.13   | 0.21         |
| V-B    | cas12b  | 4                     | 0.11         | 0.17   | 0.25         |
| V-U1   | c2c4    | 4                     | 0.14         | 0.22   | 0.44         |
| V-U2   | c2c8    | 3                     | 0.08         | 0.25   | 0.30         |
| V-U3   | c2c10   | 14                    | 0.03         | 0.04   | 0.12         |
| V-U4   | c2c9    | 11                    | 0.07         | 0.15   | 0.36         |
| V-U5   | c2c5    | 16                    | 0.15         | 0.16   | 0.19         |
| VI-A   | cas13a1 | 8                     | 0.27         | 0.39   | 0.41         |
| VI-B   | cas13b  | 515                   | 0.34         | 0.39   | 0.46         |
| VI-C   | cas13a2 | 3                     | 0.28         | 0.28   | 0.31         |



**Supplementary information S5 (figure). UPGMA dendrogram of protein family profile similarity**

Profiles were built for distinct subfamilies of type V systems (red) and TnpB family (blue). The profiles correspond to the clusters, information for which is provided in the supplementary information S2 (box, part h). The profile dendrogram was built on the basis of similarity score matrix obtained using the HHalign program (see details in the Supplementary Methods). The dotted line indicates the arbitrary similarity cutoff ~2 (in distance units shown by the scale bar below the tree) which, empirically, corresponds to the limit of confident identification of relationships between groups of sequences (i.e. the groups to the right of the line are considered to be confidently identified.)

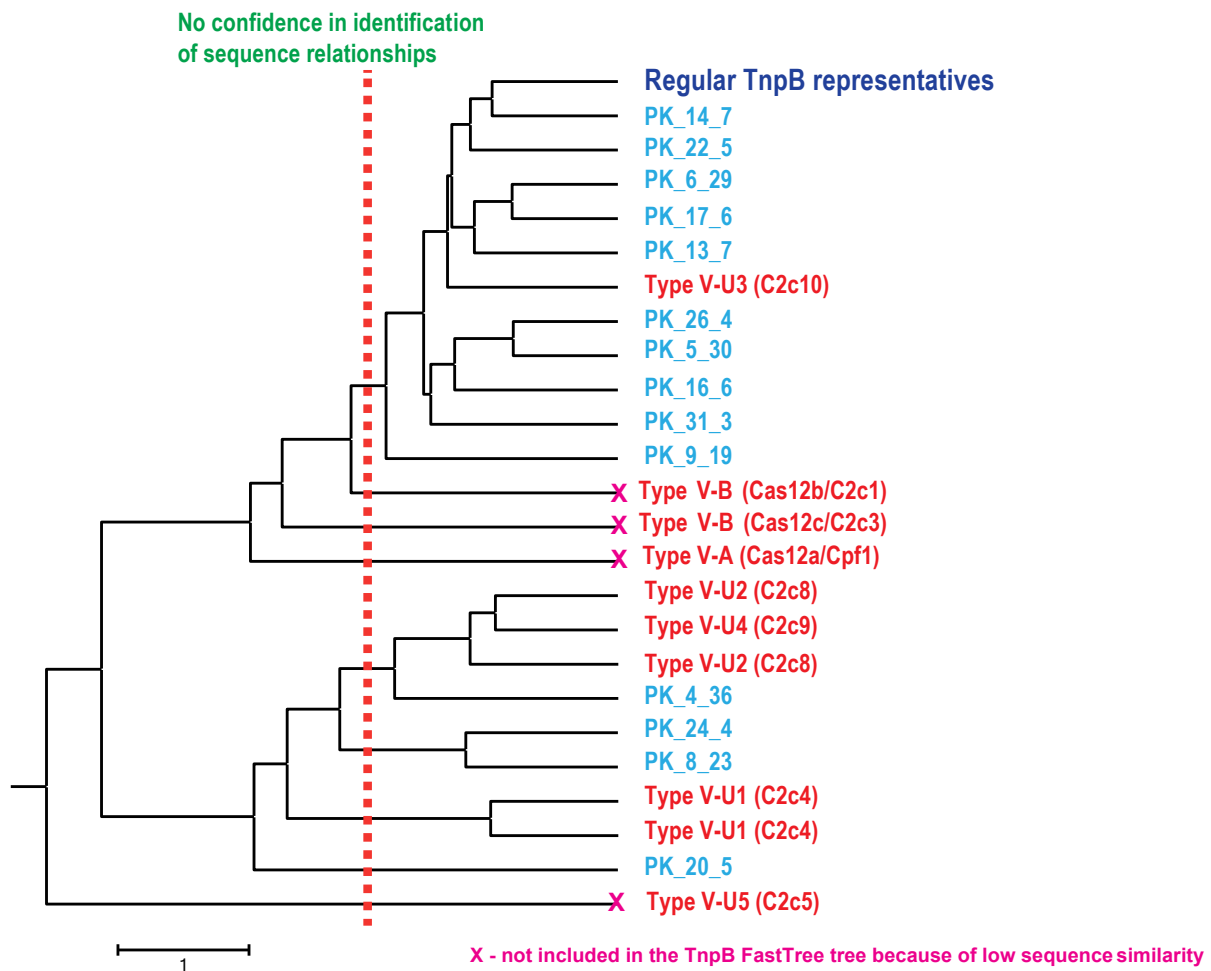

Supplementary information S6 (figure). Membrane proteins associated with Cas13b genes

Multiple alignment of representatives of predicted membrane proteins associated with Cas13b genes. Numeric sequence IDs are from Genbank. Secondary structure was predicted using the Jpred4 server. Transmembrane domain were predicted using the TMHMM server.

Variant 1.

TMHMM output

# WEBSEQUENCE Length: 181
# WEBSEQUENCE Number of predicted TMHs: 1 (shown in cyan)
# WEBSEQUENCE Exp number of AAs in TMHs: 21.52507
# WEBSEQUENCE Exp number, first 60 AAs: 21.51976
# WEBSEQUENCE Total Prop of N-in: 0.65484
# WEBSEQUENCE POSSIBLE N-term signal sequence
WEBSEQUENCE TMHMM2.0 inside 1 6
WEBSEQUENCE TMHMM2.0 TMhelix 7 29
WEBSEQUENCE TMHMM2.0 outside 30 181

HEPN domain motifs (E...RxxxxH) are shown by reverse shading.

Multiple sequence alignment of HEPN domain motifs from various species. The alignment shows conserved residues and motifs, with some regions highlighted in cyan and reverse shading. Helical segments alpha 1, alpha 2, alpha 3, and alpha 4 are indicated. Consensus sequences are provided at the bottom of each block.

Variant 2.

TMHMM output

```
# WEBSEQUENCE Length: 219
# WEBSEQUENCE Number of predicted TMHs: 4 (shown in cyan)
# WEBSEQUENCE Exp number of AAs in TMHs: 88.84536
# WEBSEQUENCE Exp number, first 60 AAs: 37.17311
# WEBSEQUENCE Total prob of N-in: 0.99188
# WEBSEQUENCE POSSIBLE N-term signal sequence
WEBSEQUENCE      TMHMM2.0  inside      1      8
WEBSEQUENCE      TMHMM2.0  TMhelix     9     31
WEBSEQUENCE      TMHMM2.0  outside     32     45
WEBSEQUENCE      TMHMM2.0  TMhelix     46     68
WEBSEQUENCE      TMHMM2.0  inside     69    140
WEBSEQUENCE      TMHMM2.0  TMhelix    141    163
WEBSEQUENCE      TMHMM2.0  outside    164    177
WEBSEQUENCE      TMHMM2.0  TMhelix    178    200
WEBSEQUENCE      TMHMM2.0  inside    201    219
```

```
501433496|Bacte|Porphyromonas gingivalis      -----MEKFSLYDFLAILPGIAFIVVFRIFSSHLHLSLPVDIPLGLESTIVYALI-CGA
545407573|Bacte|Bacteroides pyogenes          -----MNFKFSFYDFLSILLPGVIFLVAIRVAQLFWRFNMTGLYFPQGWFEFLSVYSLVIGAS
818455803|Bacte|Wolfebacteria bacterium GW2011 MDTKTFPKTSLFDQISFLMVGAIATIVIVPNMVYF-FTMPIPT-----VDLGSALVWLVI
754594446|Bacte|Capnocytophaga canimorsus      -----MDRLSIYELLSFVVPGVIMIELINESAEYV-FGKDRLI---TAGNLSDGLLFFAI
405580122|Bacte|Bergeyella zoohelcum ATCC 43767 -----MDRLSIYELLSFVVPGVIMIELINESAEYV-FGKAPLI---TAGNLSDGLLFFAI
754599666|Bacte|Capnocytophaga cynodegmi       -----MERLSIYELLSFVVLGVIMIELMNFSAEYV-FGKAPLI---TAGNLSDGLLFFAI
493307991|Bacte|Myroides odoratimimus         -----MDKLSLYELLSFVVPGGIALHLLNWCSVNV-LSTGTLF---NLSDLNSLIAALVF
503850671|Bacte|Flavobacterium branchiophilum -----MEKLSLYELLSFVVPGVVLELSKWFGSFF-I--DANF--NLDESLSNLSLLQFTII
CONSENSUS 0.8                                -----YE--S--PG-----L--
```

```
501433496|Bacte|Porphyromonas gingivalis      VLYVLSFSL---VKLFPRL---FGL-YRHVADLYQKMK-ALHPIMND-TLNRQAEQWGL
545407573|Bacte|Bacteroides pyogenes          L-YVLGFSVKKNYSGPFRC----LGL-YEHVTILYRFE-TLHPPMNG-ALNKYAEWNG
818455803|Bacte|Wolfebacteria bacterium GW2011 S-YFLGHVVIHGISNAIRDIPIIPLD-WESKLAYLPHEALLKE-----AEAYFEQPYQE
754594446|Bacte|Capnocytophaga canimorsus      A-LFIGCLIHIIITFRLIKRK---WYKKLAYKPINEIENNAIYKQ-----IFTTLKEEYSK
405580122|Bacte|Bergeyella zoohelcum ATCC 43767 A-LFIGCLIHIIITFRLIKRK---WYKKLACTPMDKMKNDYITE-----ILPDLKEIYRT
754599666|Bacte|Capnocytophaga cynodegmi       A-LFIGCLIHIIITFRLIKRK---WYQKLACTPMDKMKNDYITE-----ILPDLKEIYRT
493307991|Bacte|Myroides odoratimimus         A-LLIGVTLHIITFNILLK---CGS--YRQIIYKSVQEIKLDDYIQQ-VIPFLNQEYFH
503850671|Bacte|Flavobacterium branchiophilum A-LFLGIIIHVLTFFKIFMK----IKW--YKDLIYKSVQKISVENDFIQKAIPFLNEHYIA
CONSENSUS 0.8                                -----G-----
```

```
501433496|Bacte|Porphyromonas gingivalis      GKIYLSEEEF--CQSEKEKIRMLQSDFYDRMWRDLDFRGLKGNAKSFQCYYFFFRHSF
545407573|Bacte|Bacteroides pyogenes          TKPYCTVEQYDAMDASAQKEIEDAQDIFYDHMYRLDCKGKLEGAKAFQSYLCLFHSFL
818455803|Bacte|Wolfebacteria bacterium GW2011 KKP-----DHLWLSLCYIFATAKDTTSQVETFSAYYNLYRG---
754594446|Bacte|Capnocytophaga canimorsus      IHN-----INSIDEISKLNIFESGYYLEAQGKISQAKNFQSYFLFRNIVT
405580122|Bacte|Bergeyella zoohelcum ATCC 43767 NKG-----ISVTENISNGSVFDTAYYYLEAQGKISQAKNFQSYFLFRNIVT
754599666|Bacte|Capnocytophaga cynodegmi       NKG-----ISATENISNGSVFDTAYYYLEAQGKISQAKNFQSYFLFRNIVT
493307991|Bacte|Myroides odoratimimus         NKK-----HEVAANTNNAVPAENLFDYAYYYLEVNGKNAQAKNFQSYFFFRNMF
503850671|Bacte|Flavobacterium branchiophilum HR-----KHTEKPVNENEAEENLFDYAYYYLEINDKIAAKSFQSYFLFRNFF
CONSENSUS 0.8                                -----Y--L--K-----Y--
```

```
501433496|Bacte|Porphyromonas gingivalis      ---WGLVLSLILLSYKLLAY--IPACDMEDIGWREYSDIAPVPIMILSALFVFL--AQWF
545407573|Bacte|Bacteroides pyogenes          GLLIFGVYLLICILLSYFMDV--LLADT-----WQVAFLFLMNLCVMYLFMRLARW
818455803|Bacte|Wolfebacteria bacterium GW2011 ---WFTTLLIETLFLSYFLVF--SYTHA-----MLAVWILSIAIAVLMYR-RAKRF
754594446|Bacte|Capnocytophaga canimorsus      LSLFVLPVSVIFLLISFFMKD-CTLSGK-----IITIIIGTL-VIGGLSSV-IAQWF
405580122|Bacte|Bergeyella zoohelcum ATCC 43767 LSLFVLPVSVIFLLASFFMND-CSLSEK-----IITIIIGTF-VIGGLSSV-IAQWF
754599666|Bacte|Capnocytophaga cynodegmi       LSLFVLPVSVIFLLASFFMND-CKLSGK-----IITIIGTL-VIGGISSV-IAQWF
493307991|Bacte|Myroides odoratimimus         LGIVSIVILIIALVYSTITSV-GKDVLS-----EIVLKIAFFAVIIGIAVP-VANWL
503850671|Bacte|Flavobacterium branchiophilum ITLFFLPISVITILILYTQNYCCLQRT-----ALTAFILLIIAFILVY-IGRWL
CONSENSUS 0.8                                -----
```

```
501433496|Bacte|Porphyromonas gingivalis      RIKMVEKMYWTFYISLIEQENSN---
545407573|Bacte|Bacteroides pyogenes          RQRMVLKMYWAFYSLEIE-----
818455803|Bacte|Wolfebacteria bacterium GW2011 WQYLHDKVFGIFLITLKFPKETV--
754594446|Bacte|Capnocytophaga canimorsus      RVKMTDRIFGLYAELTHNKK-----
405580122|Bacte|Bergeyella zoohelcum ATCC 43767 RVKMTDRIFGLYAELTHNKK-----
754599666|Bacte|Capnocytophaga cynodegmi       RVKMTDRIFGLYAELTHHKK-----
493307991|Bacte|Myroides odoratimimus         RKKMIITVFGCYADRVHQTNK-----
503850671|Bacte|Flavobacterium branchiophilum REKTVEKVISYVAITHEENNKTK
CONSENSUS 0.8                                -----YY-----
```
